# Supplementary material for: Prognostic Implications of Lateral Lymph Nodes in Rectal Cancer: A Population-Based Cross-sectional Study With Standardized Radiological Evaluation After Dedicated Training
Source: PubMed Central journal article supplement (PMC10715698; doi:10.1097/dcr.0000000000002752), 2023-06-01

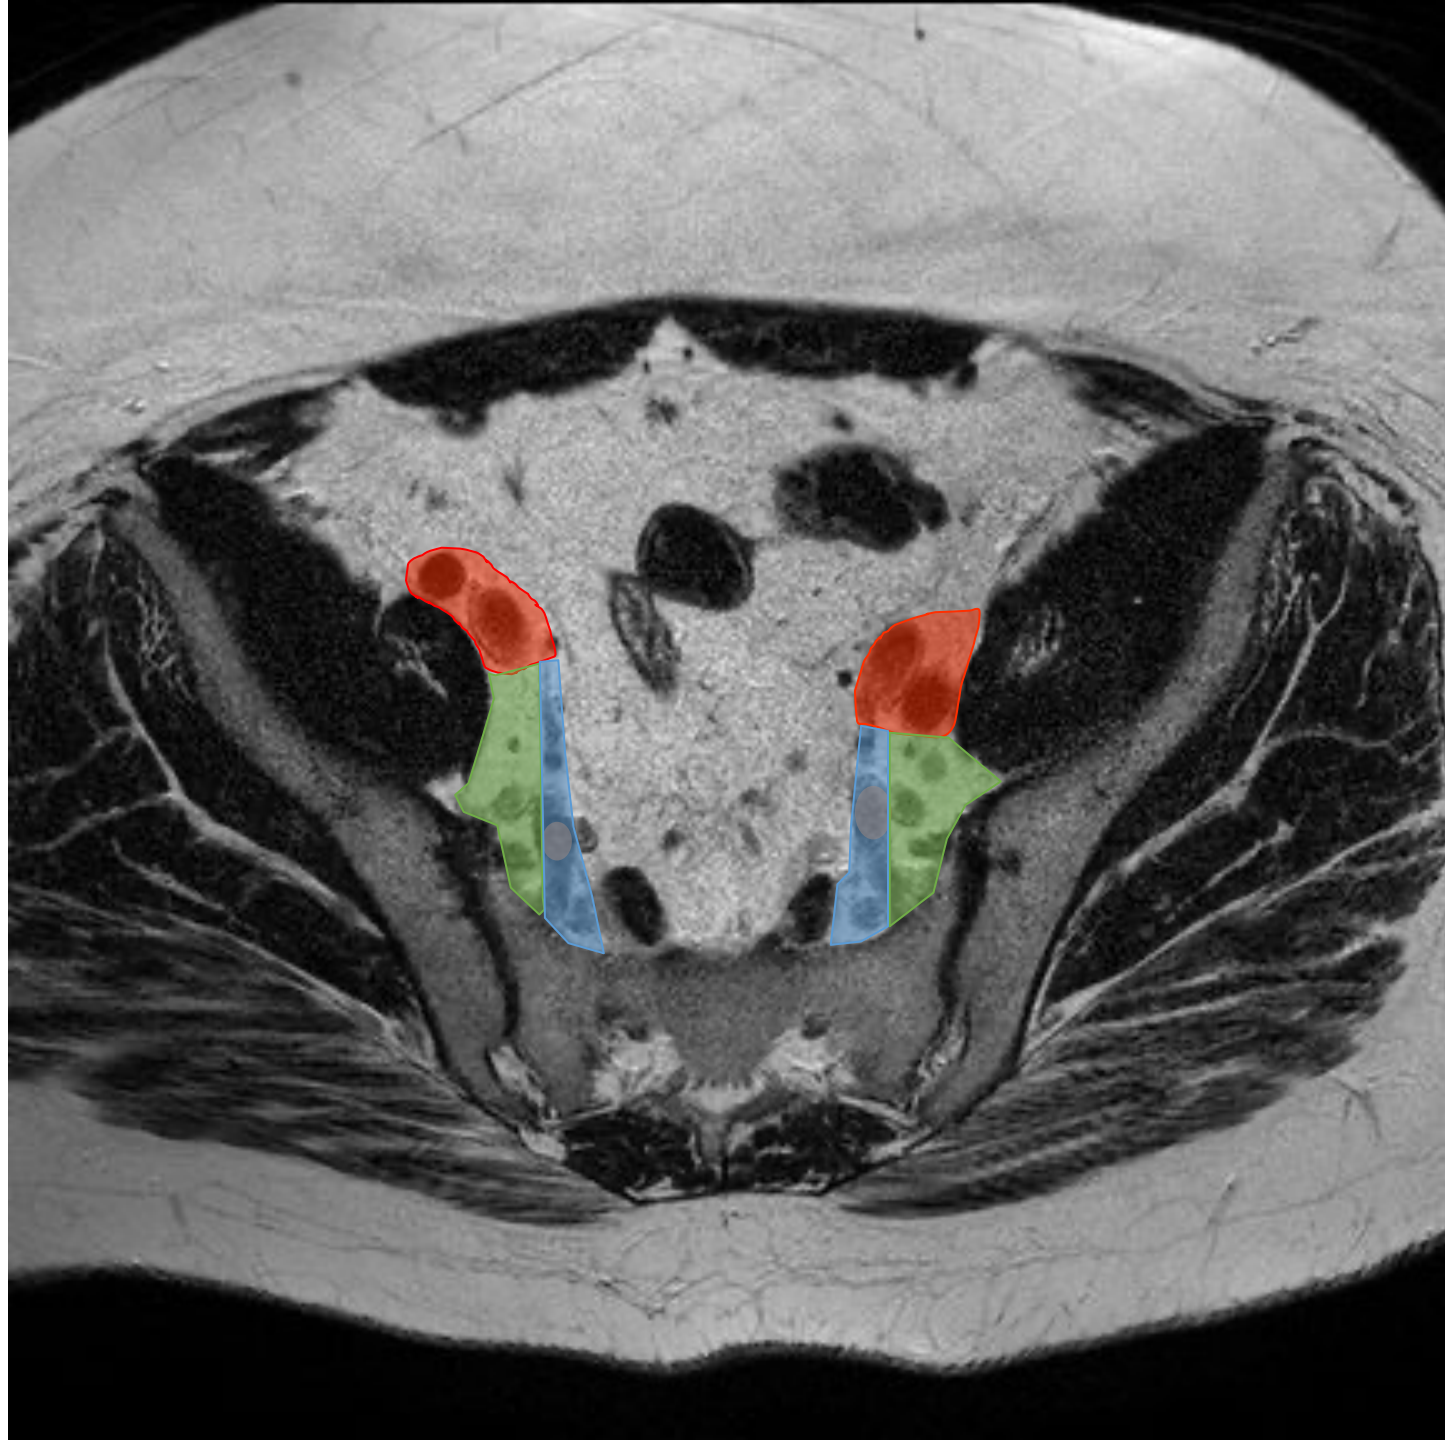

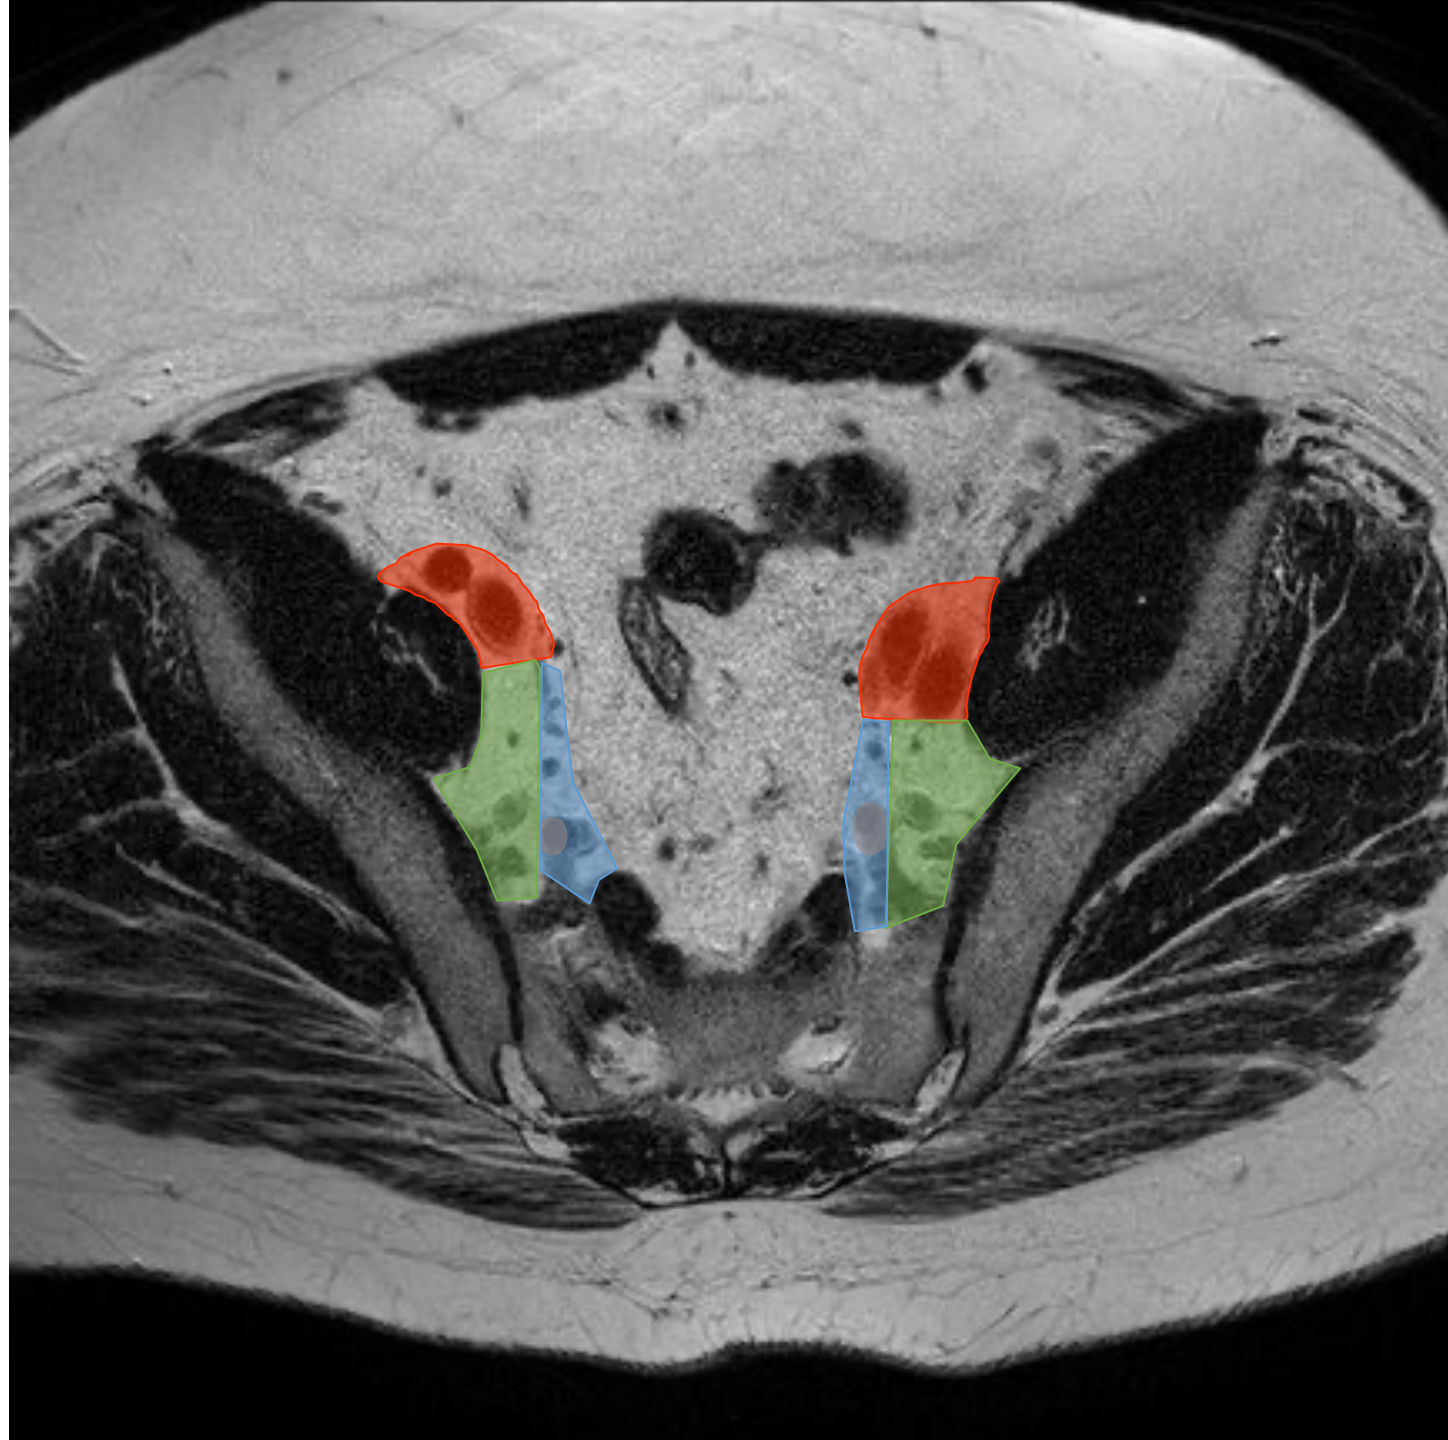

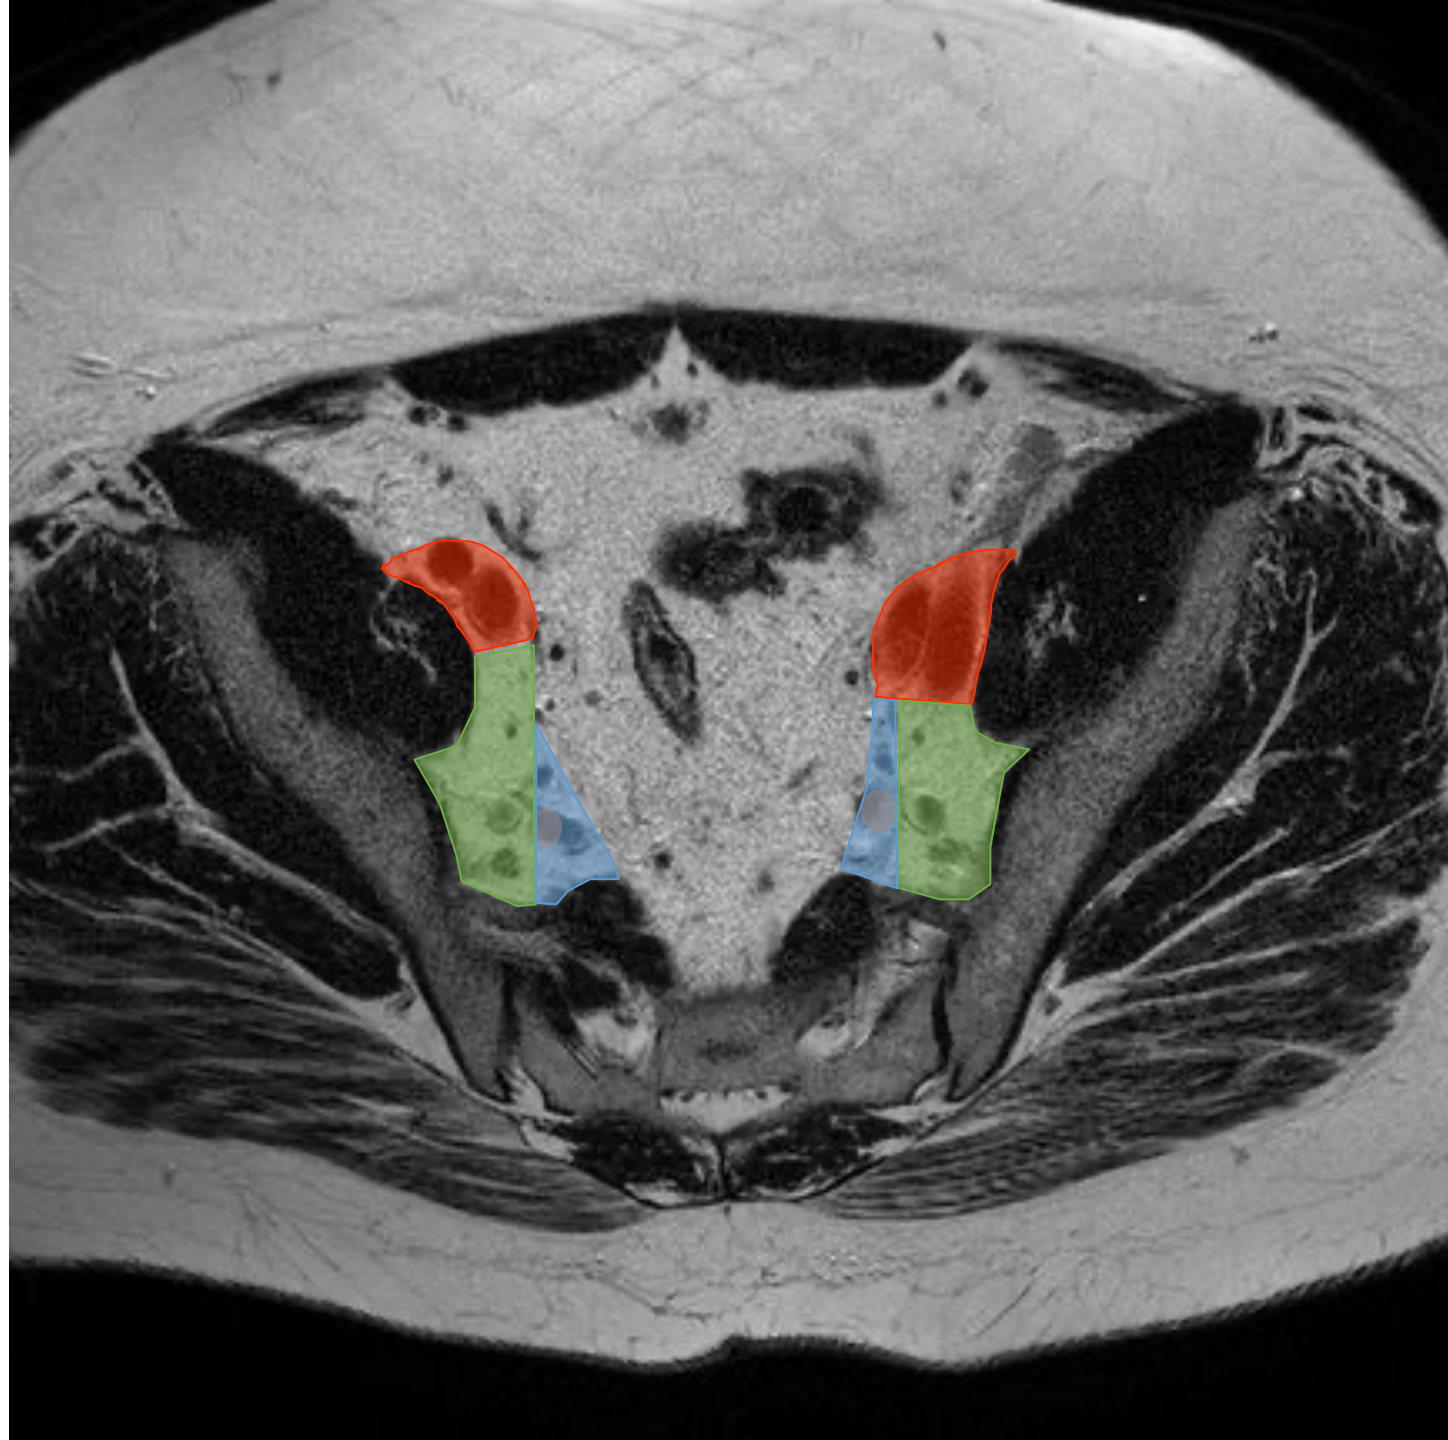



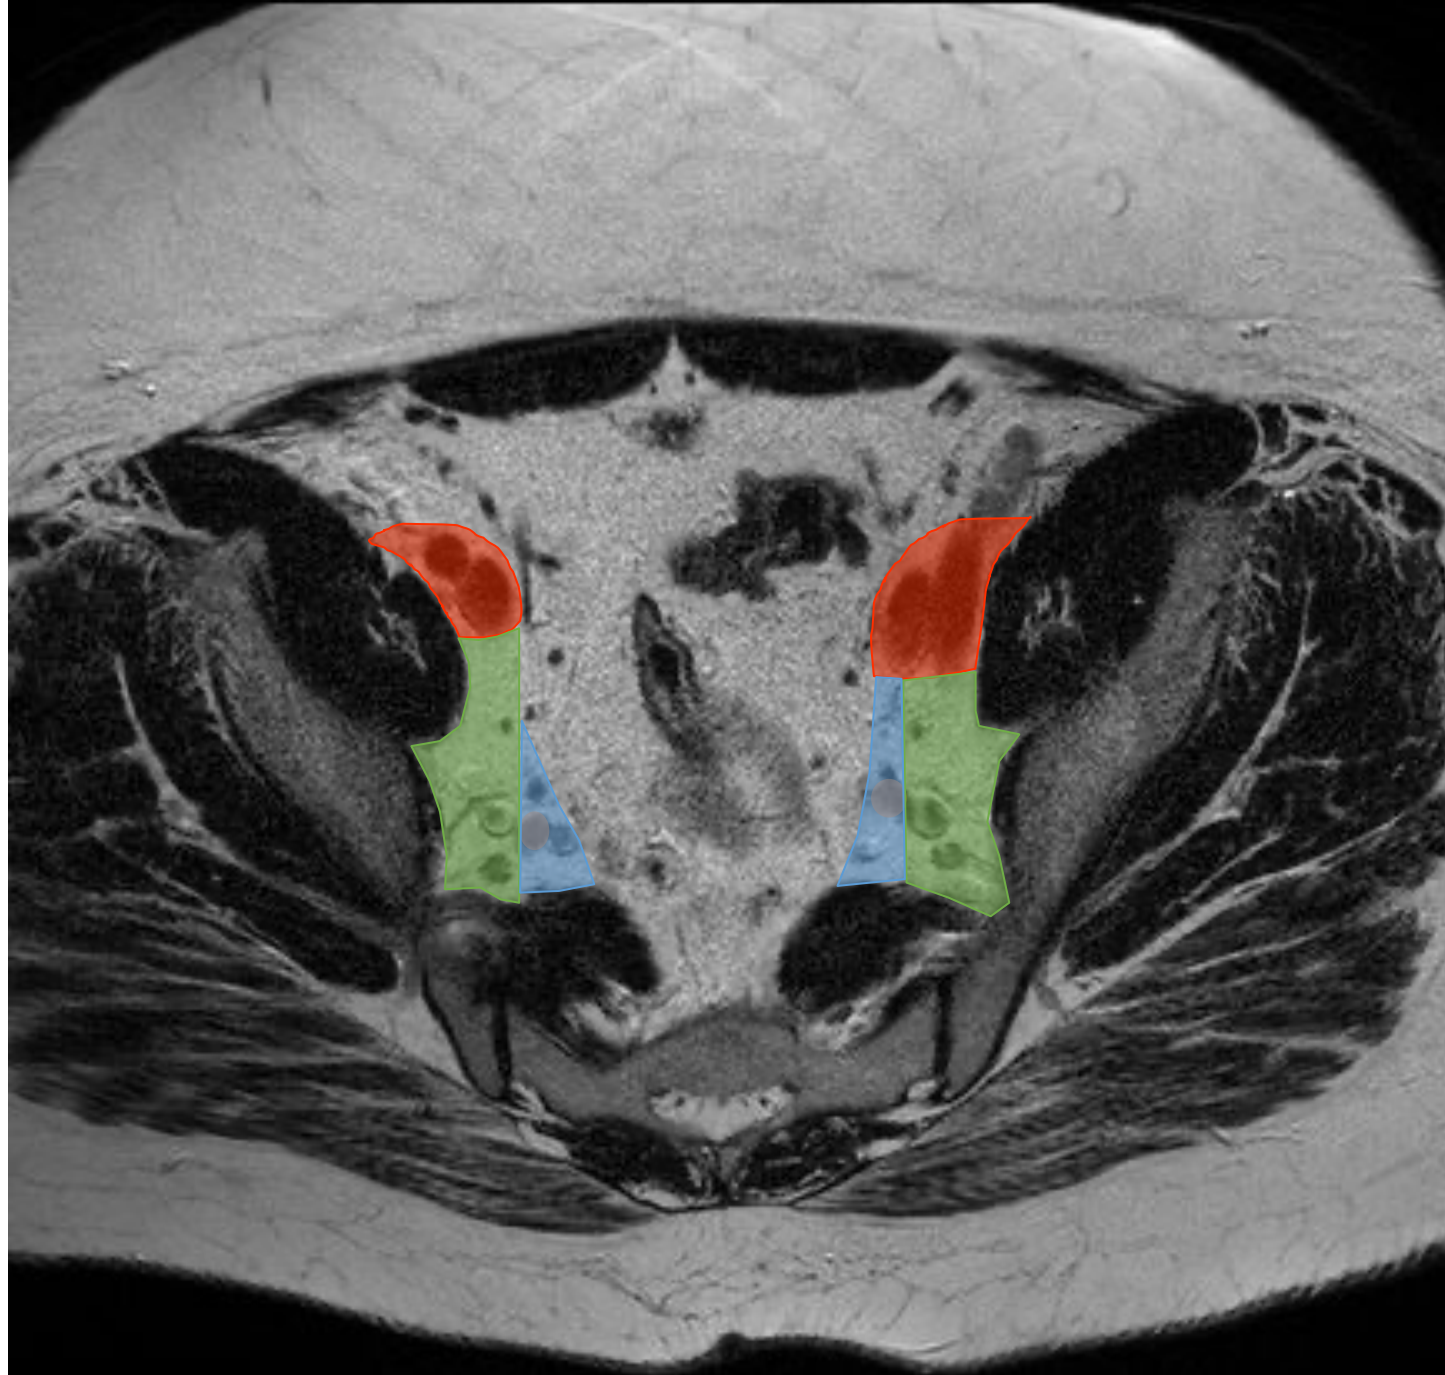

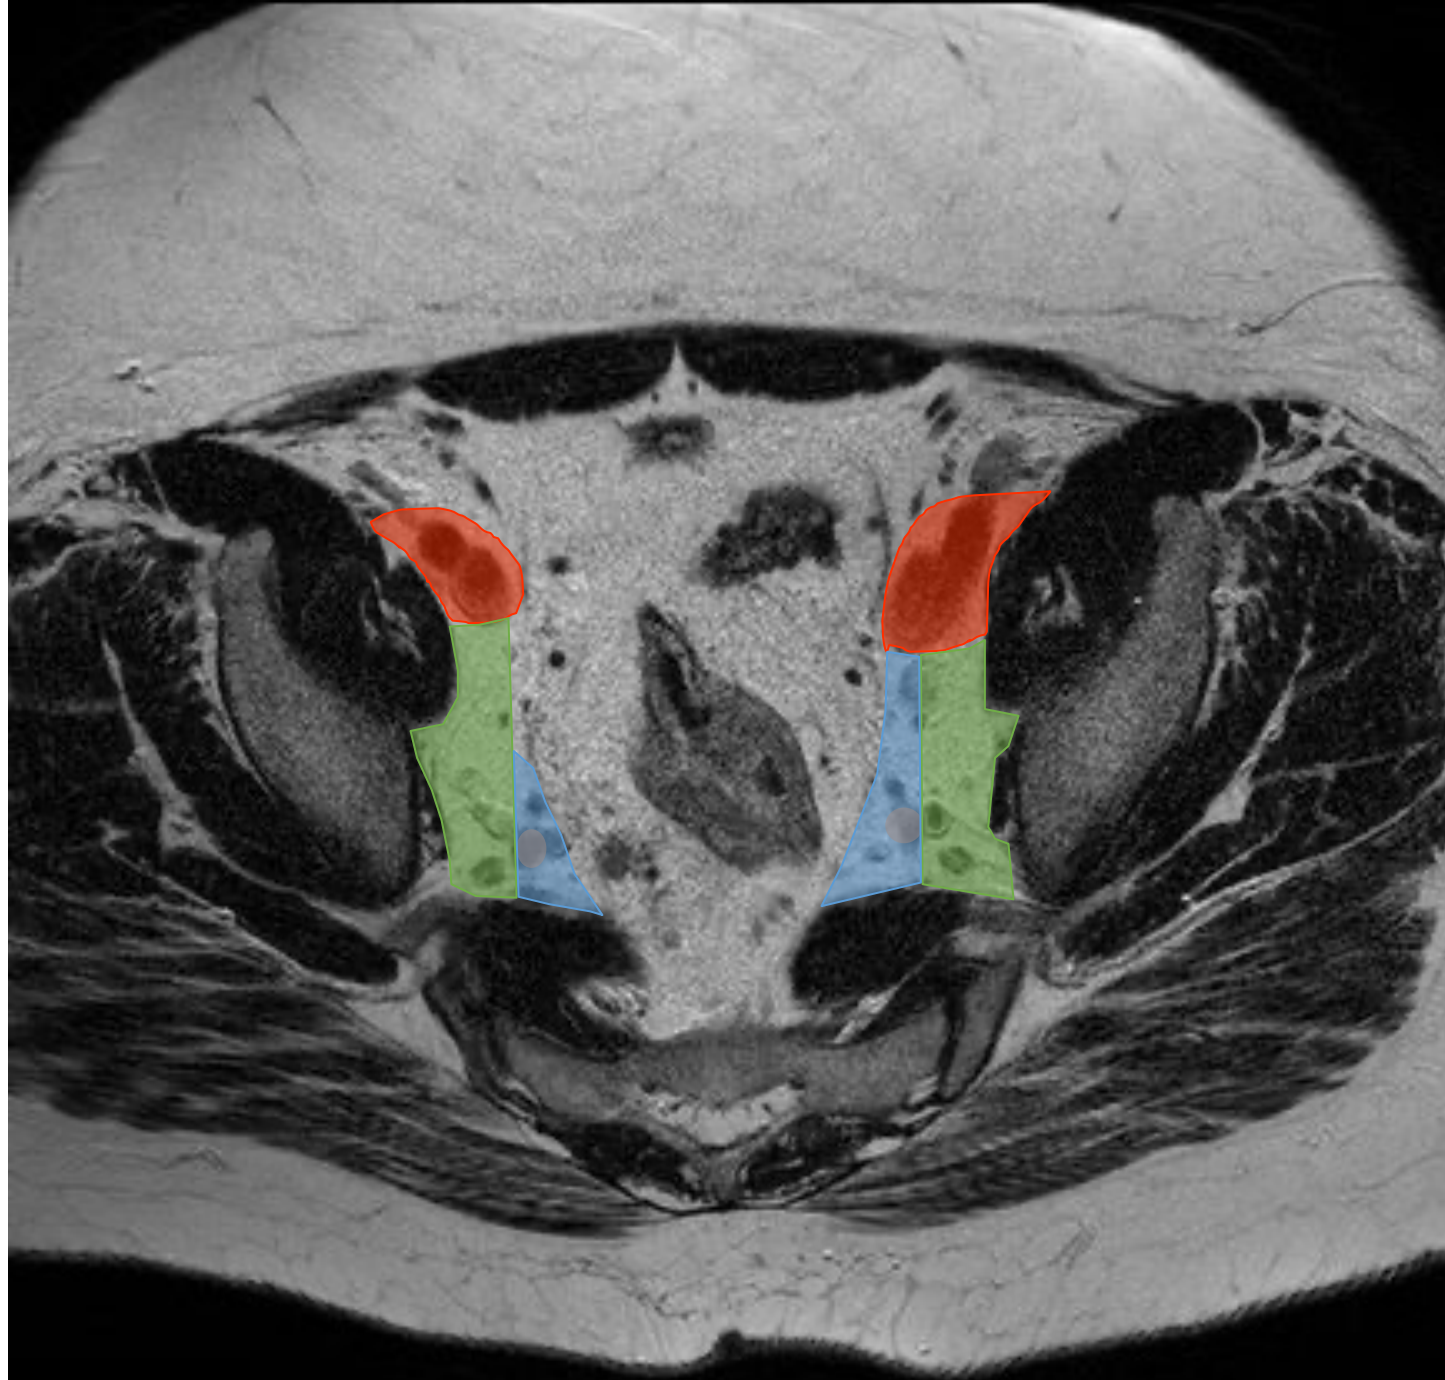

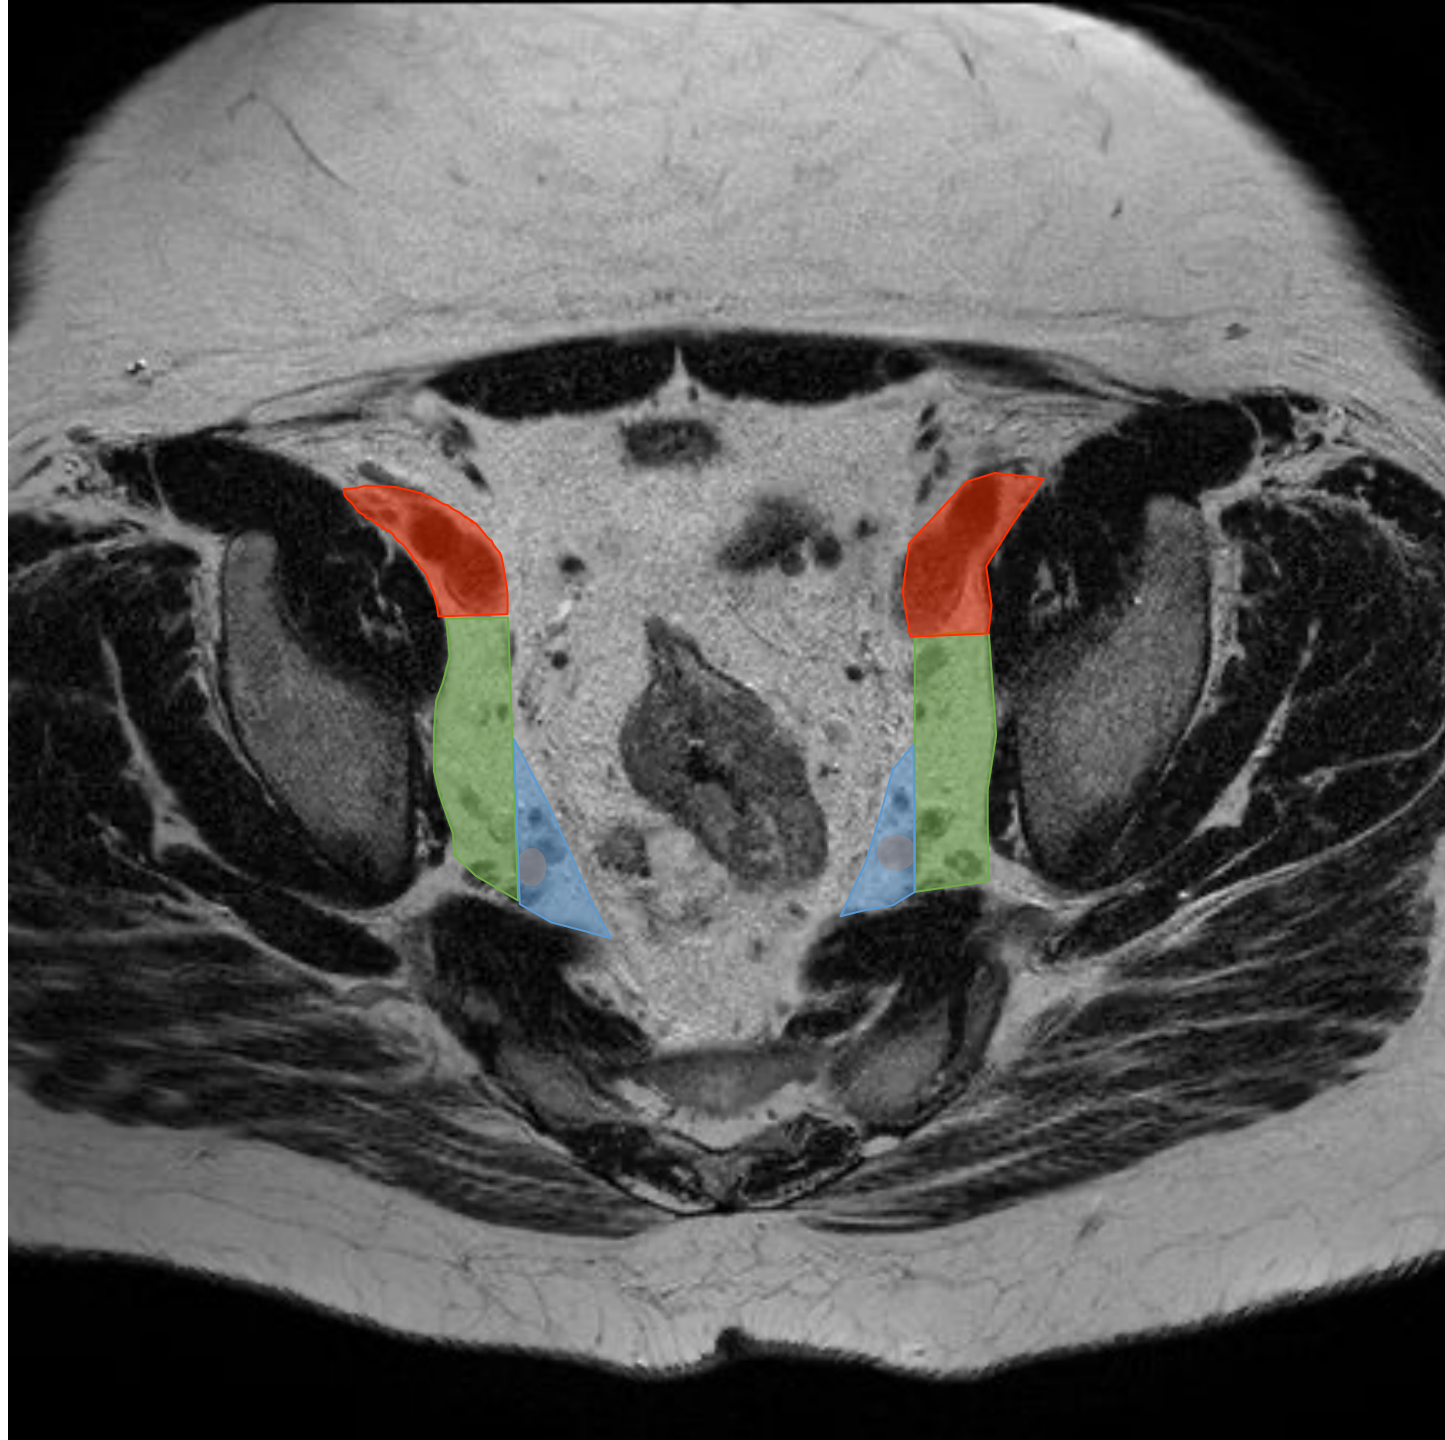



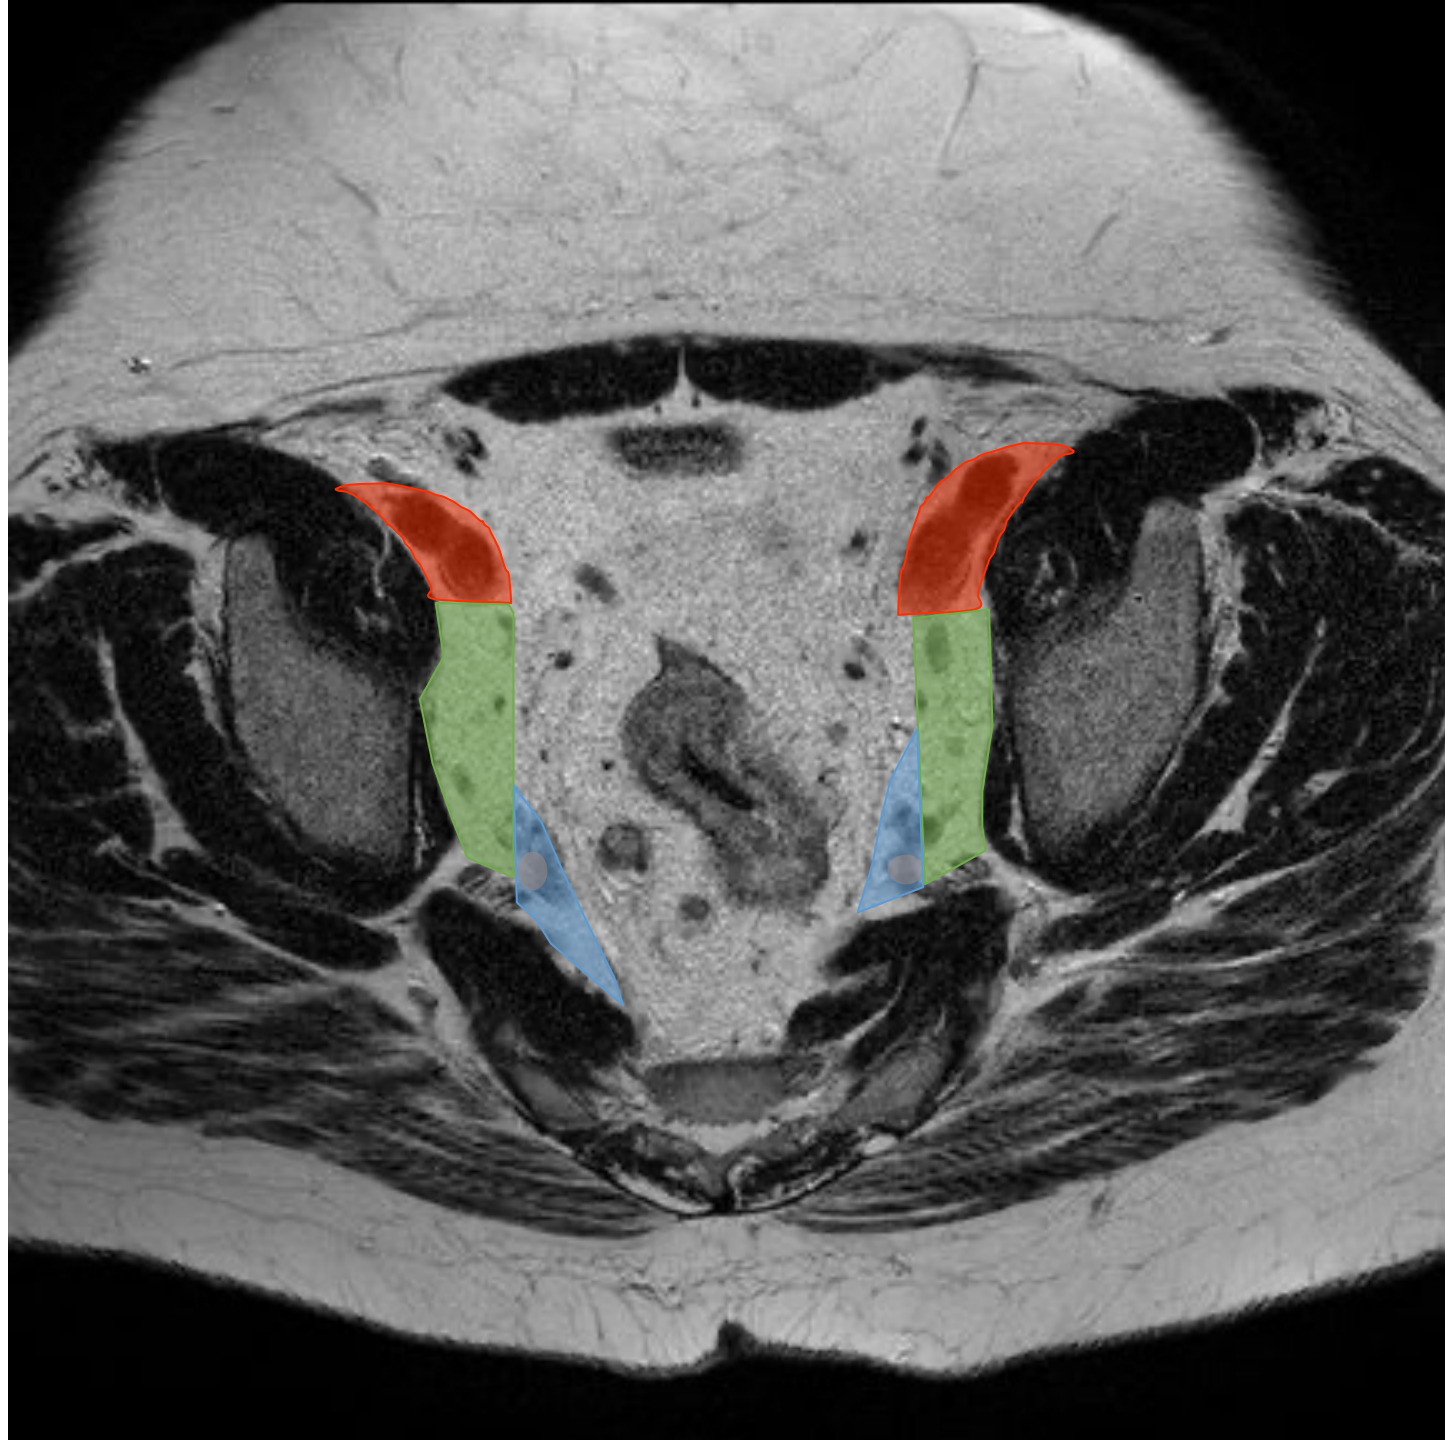

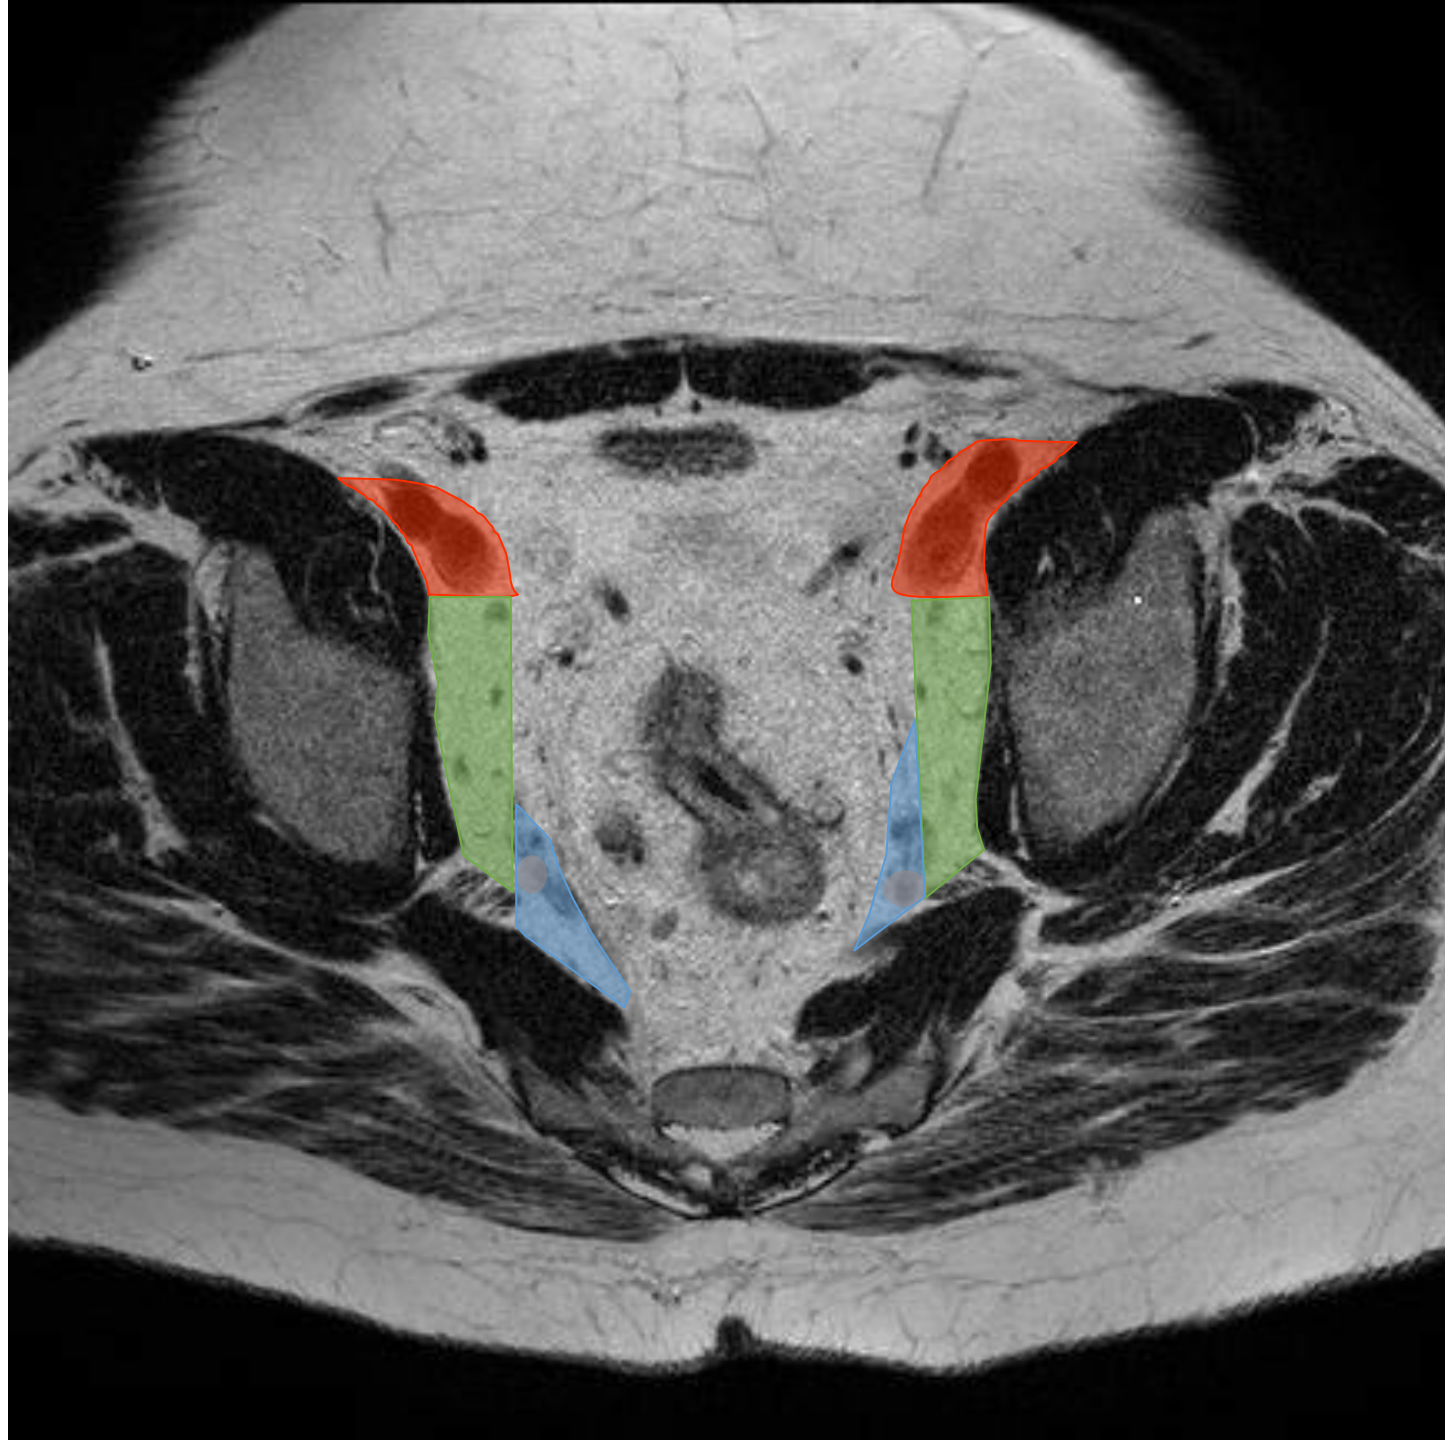



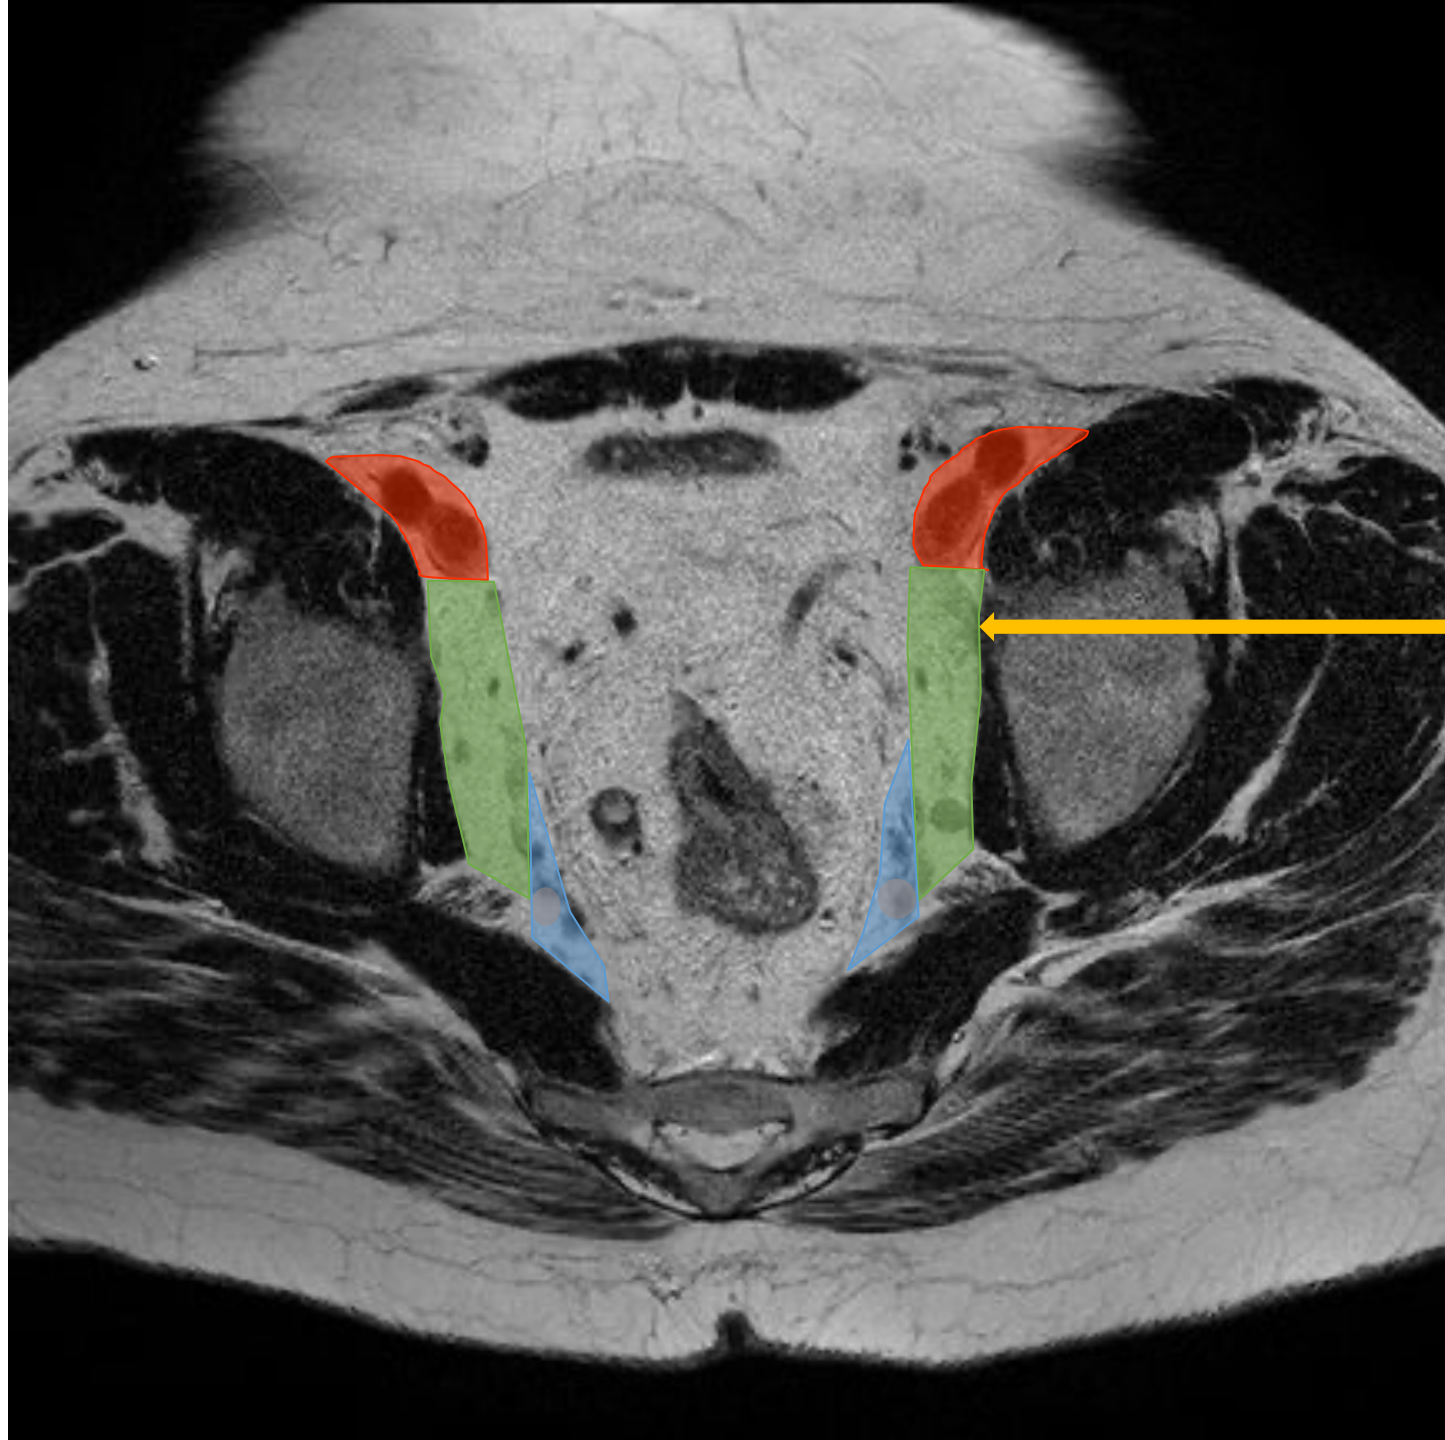

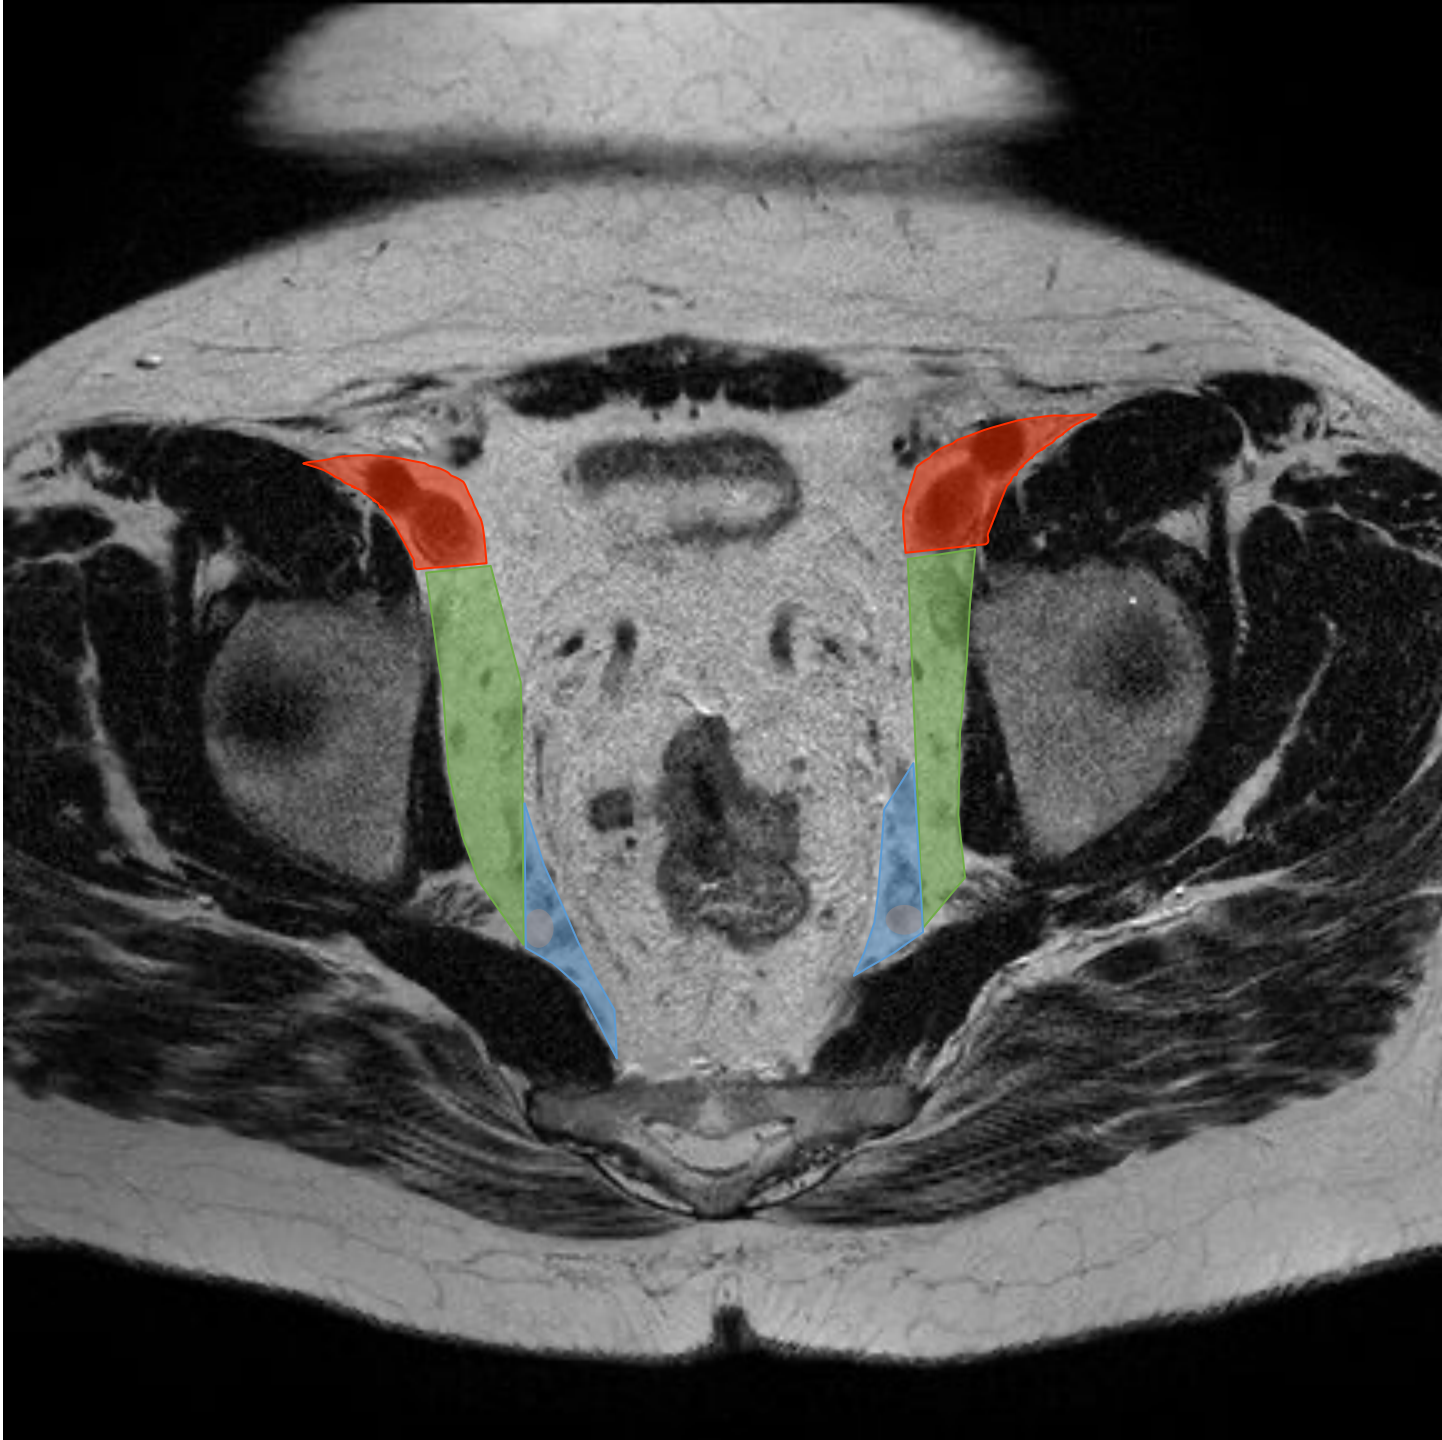

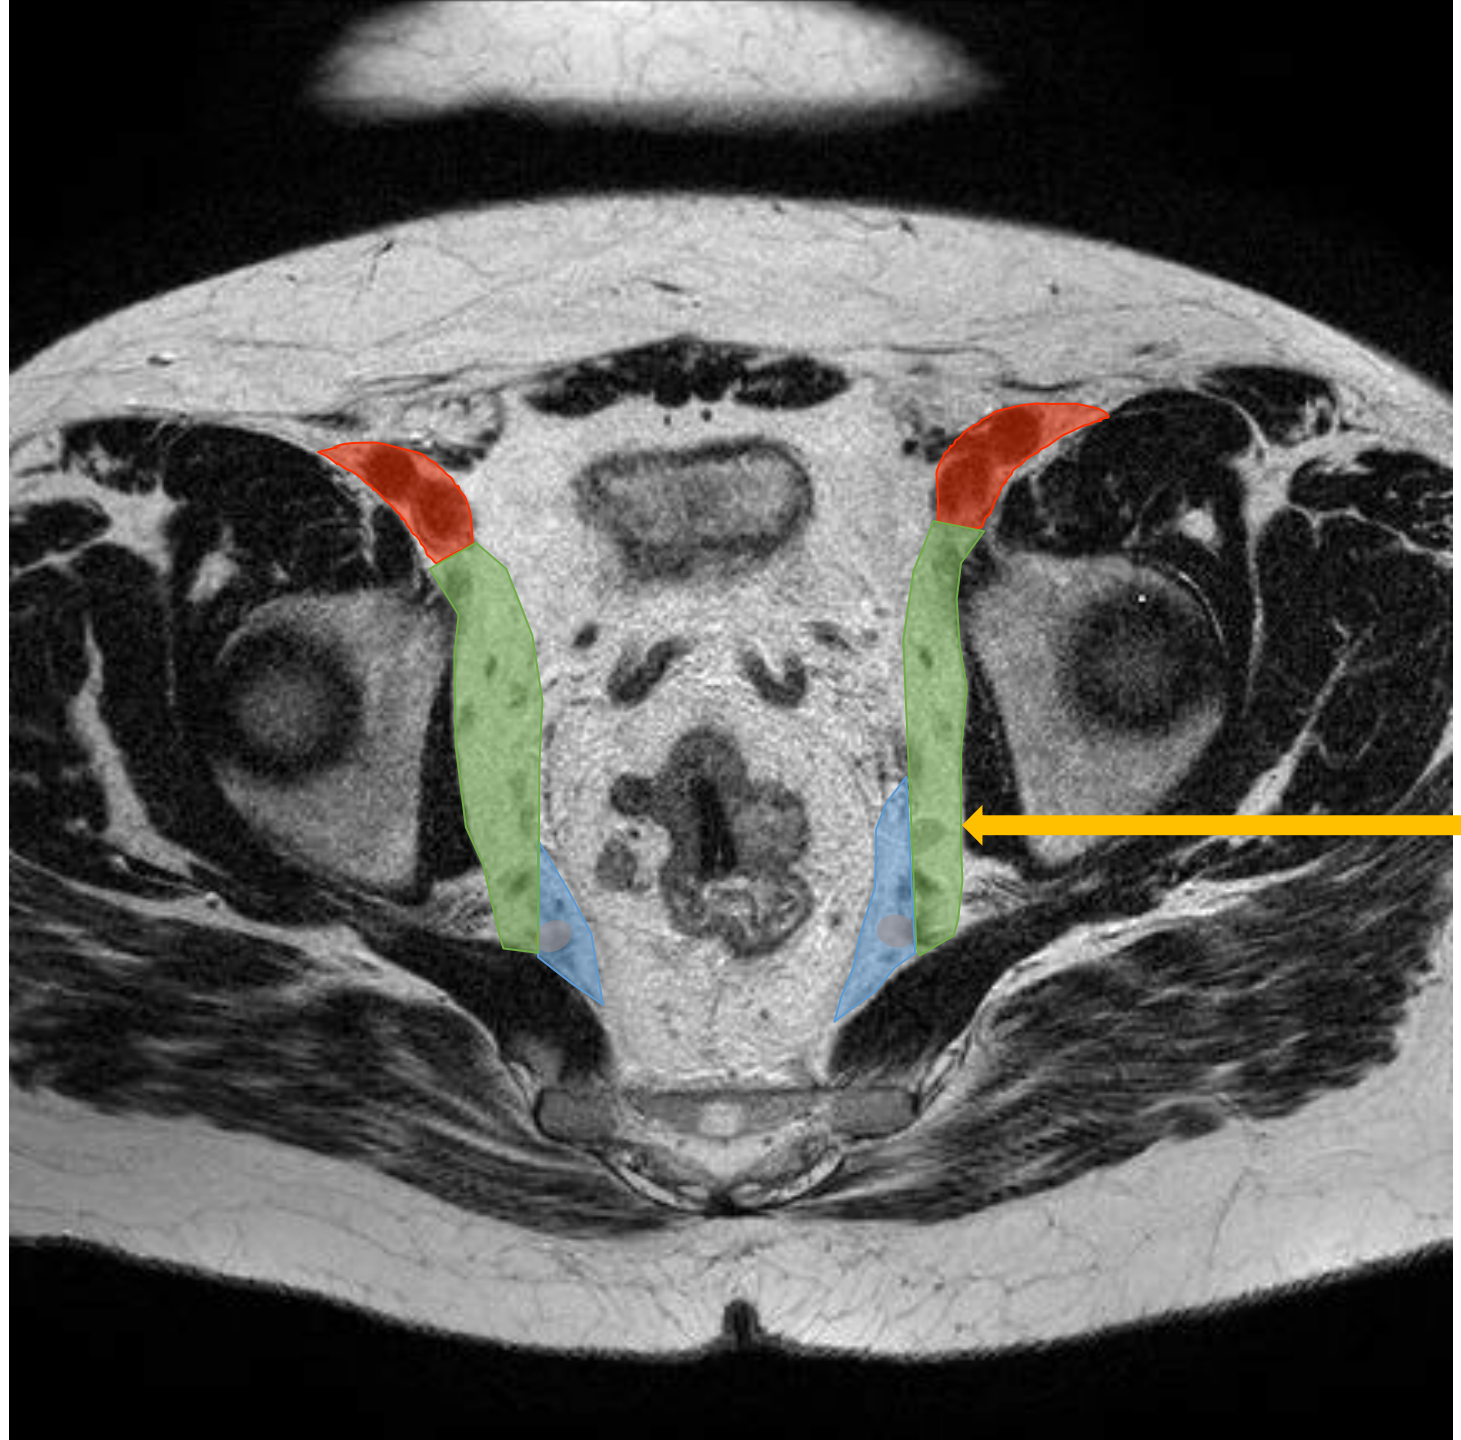



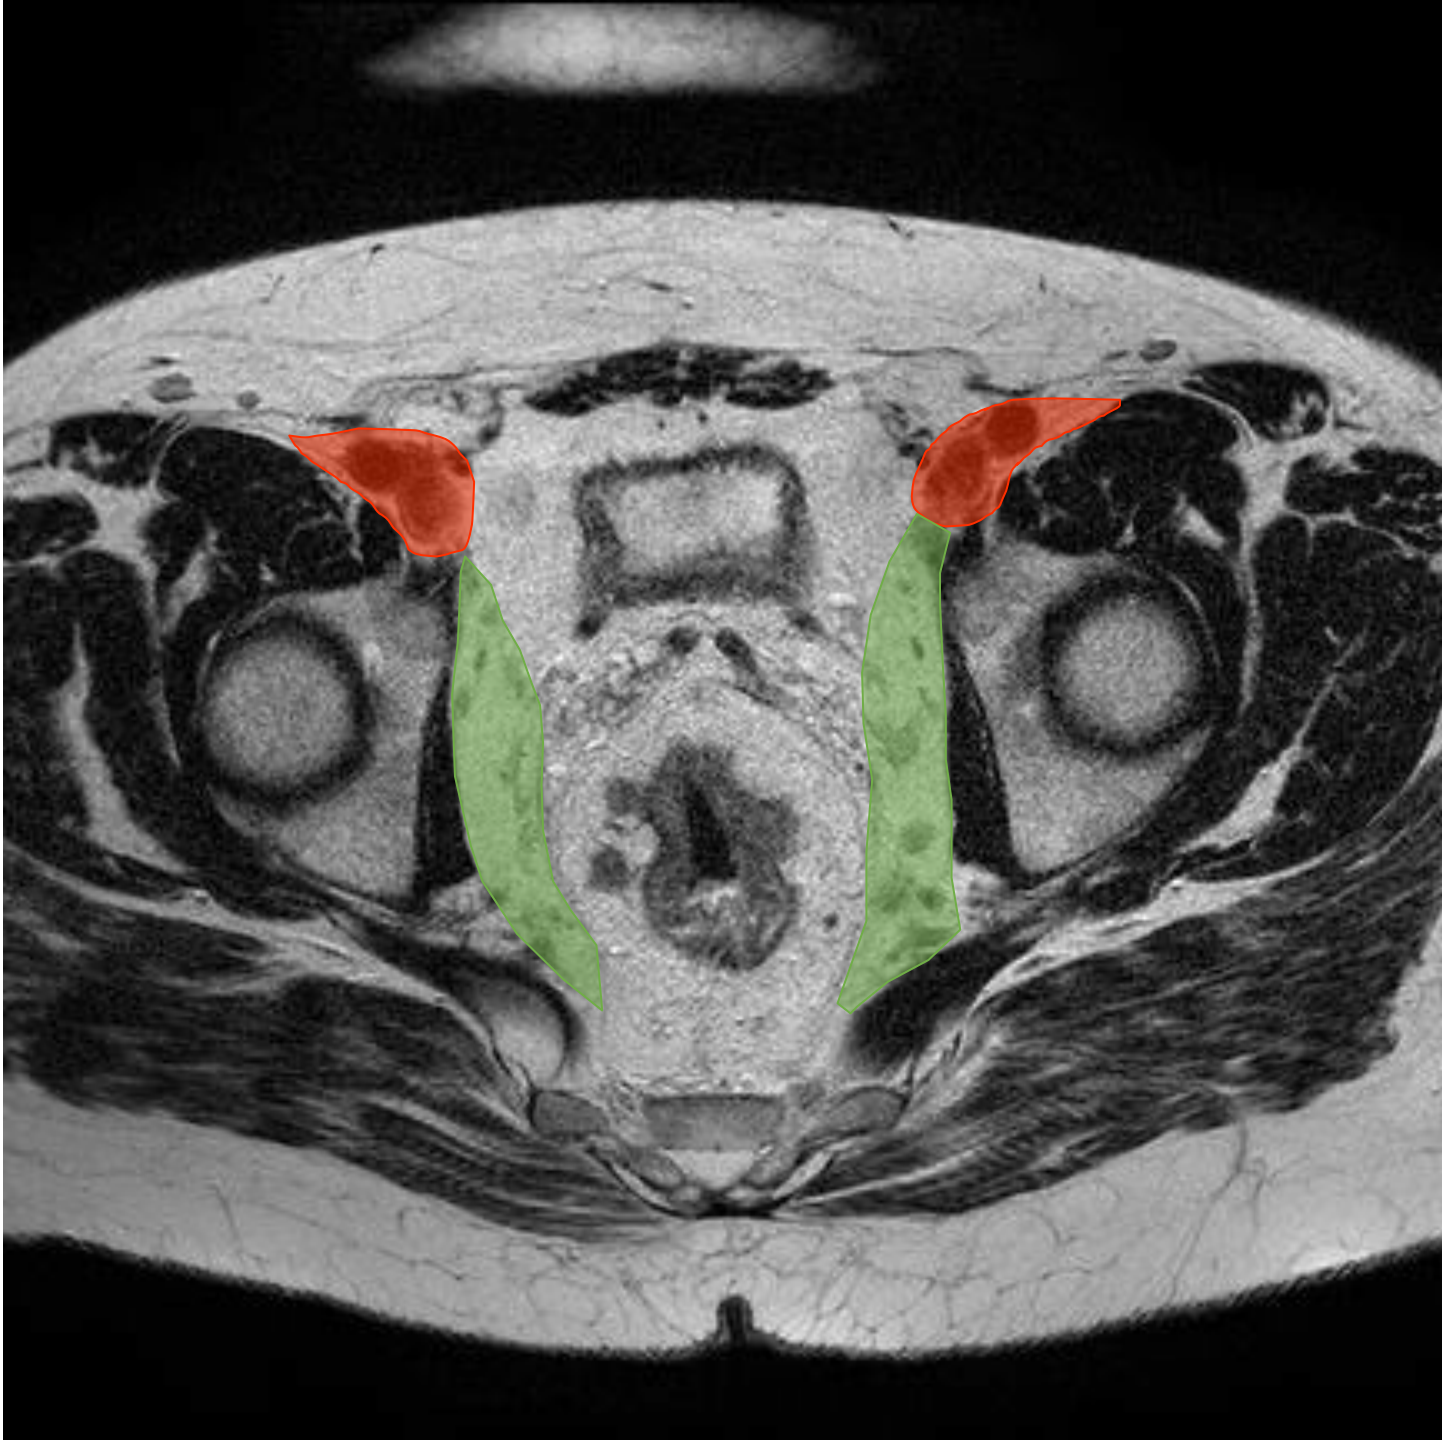

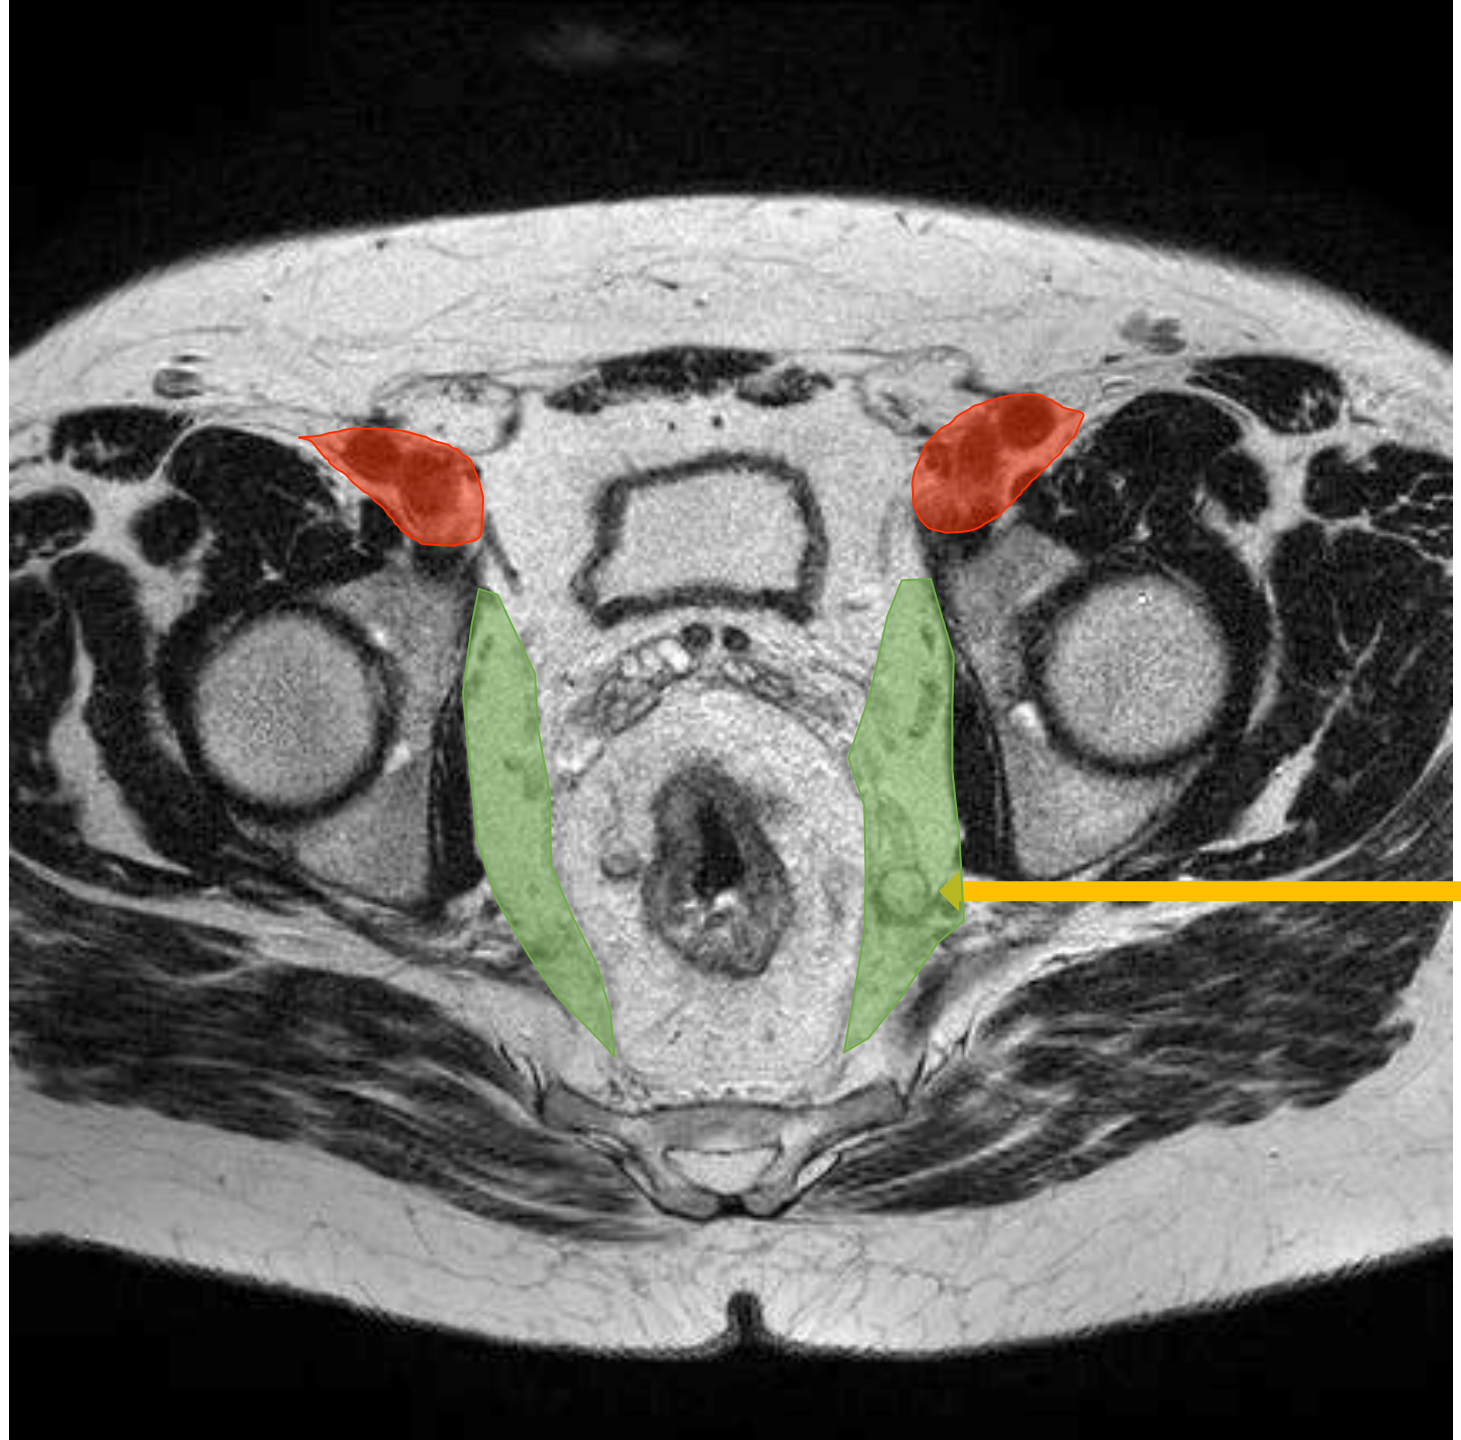

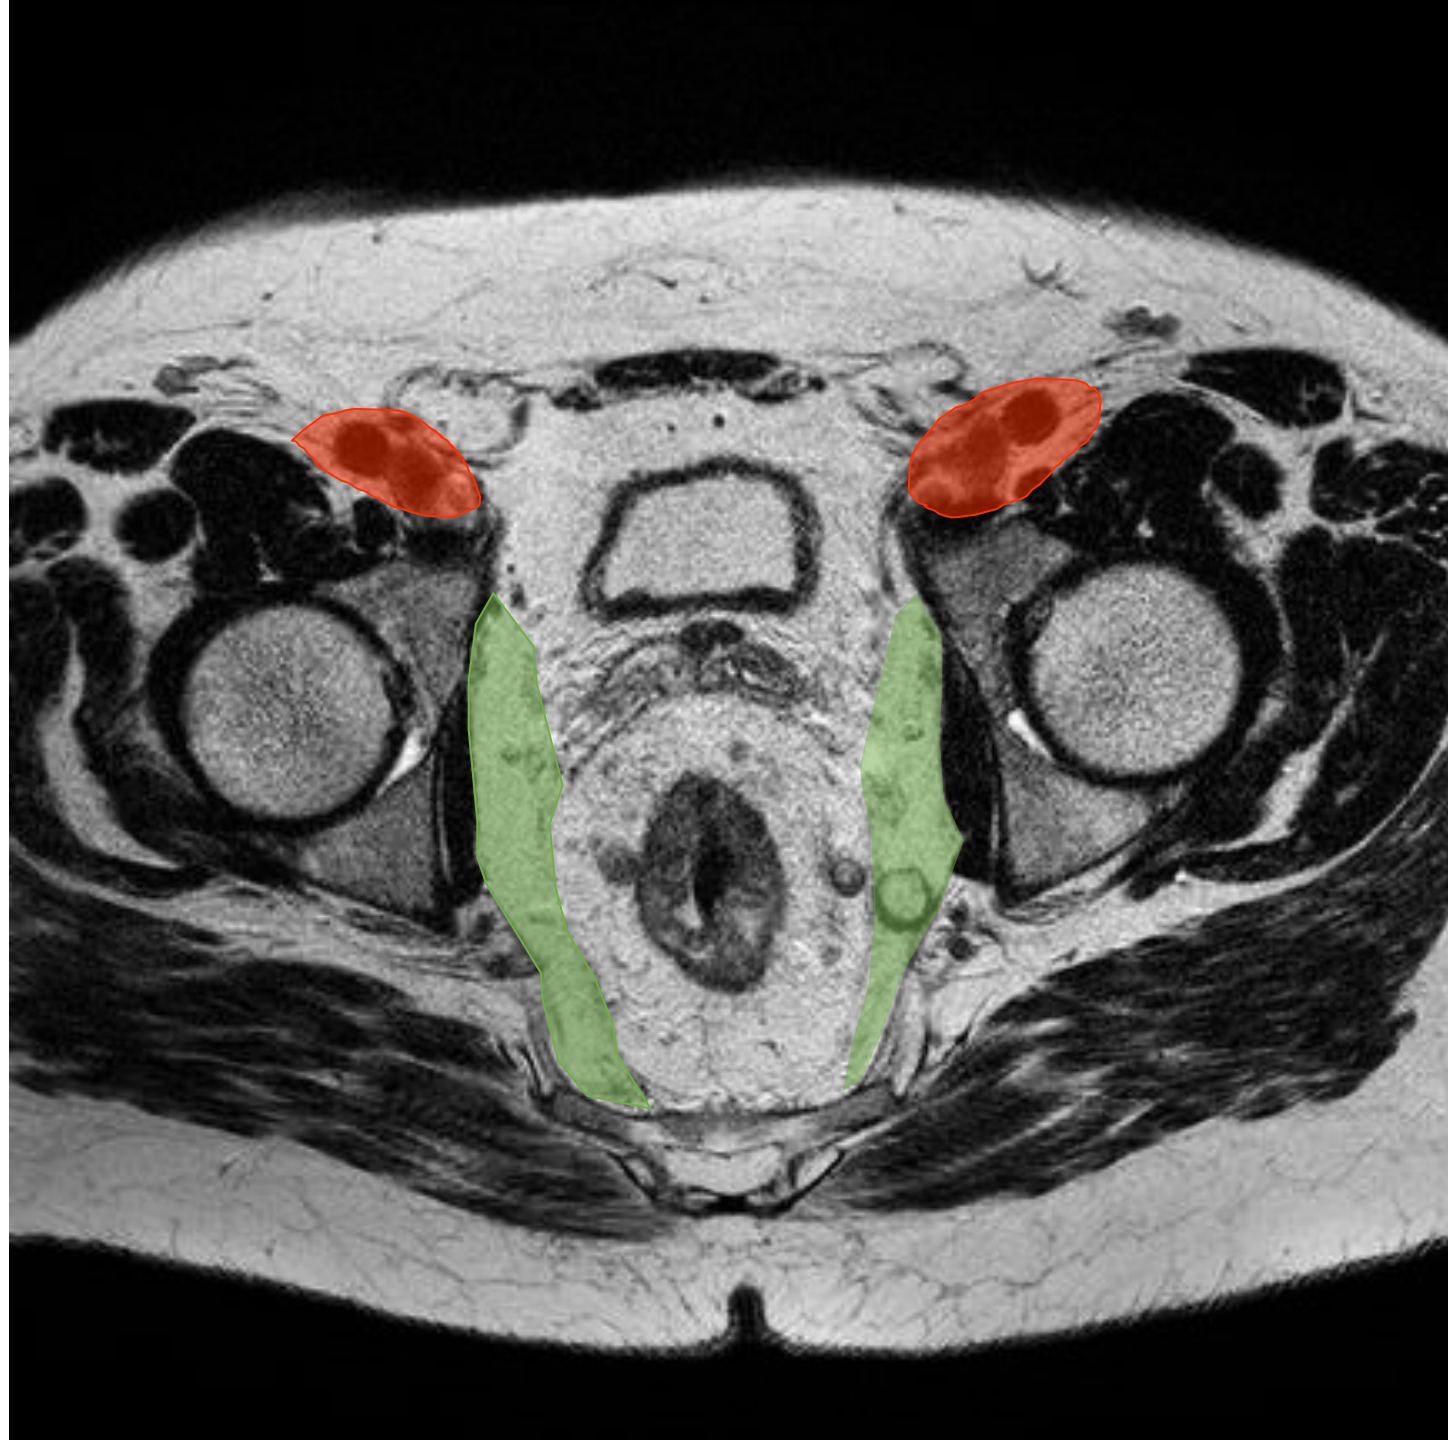



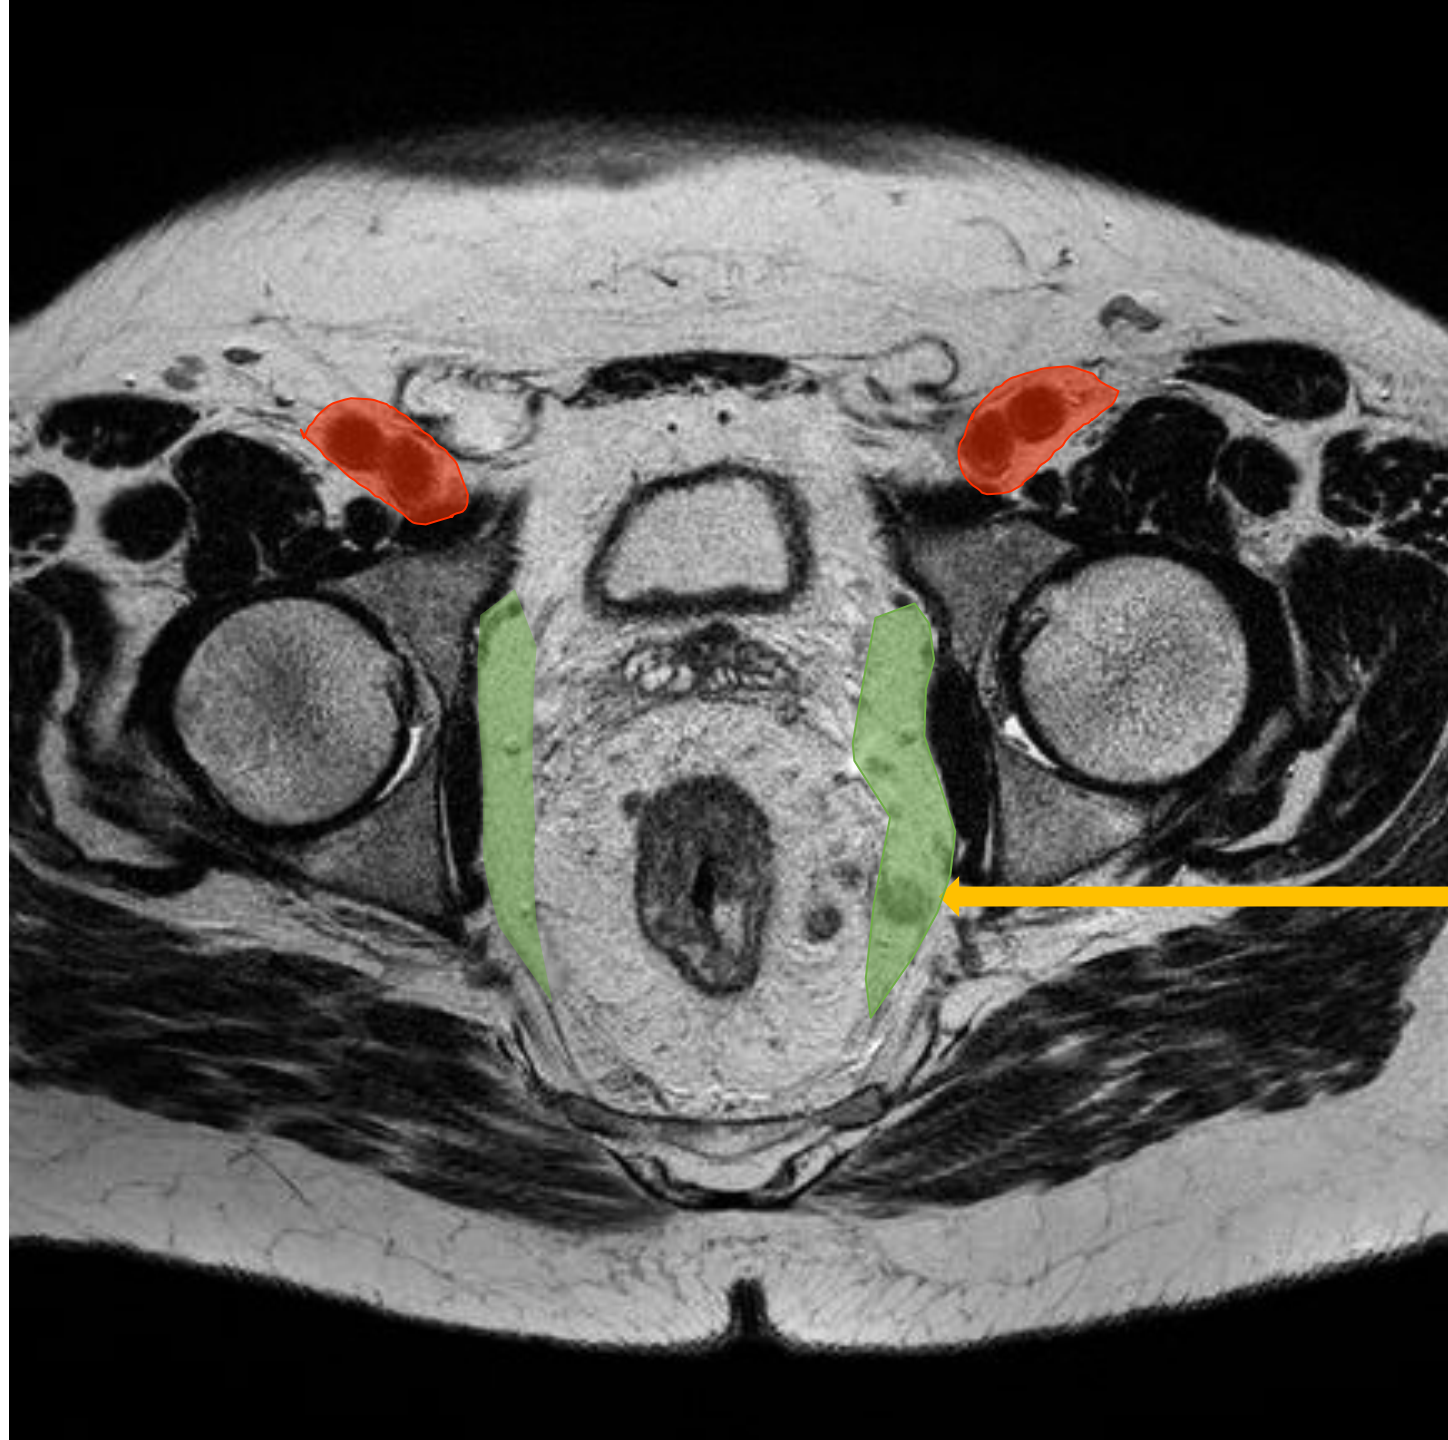

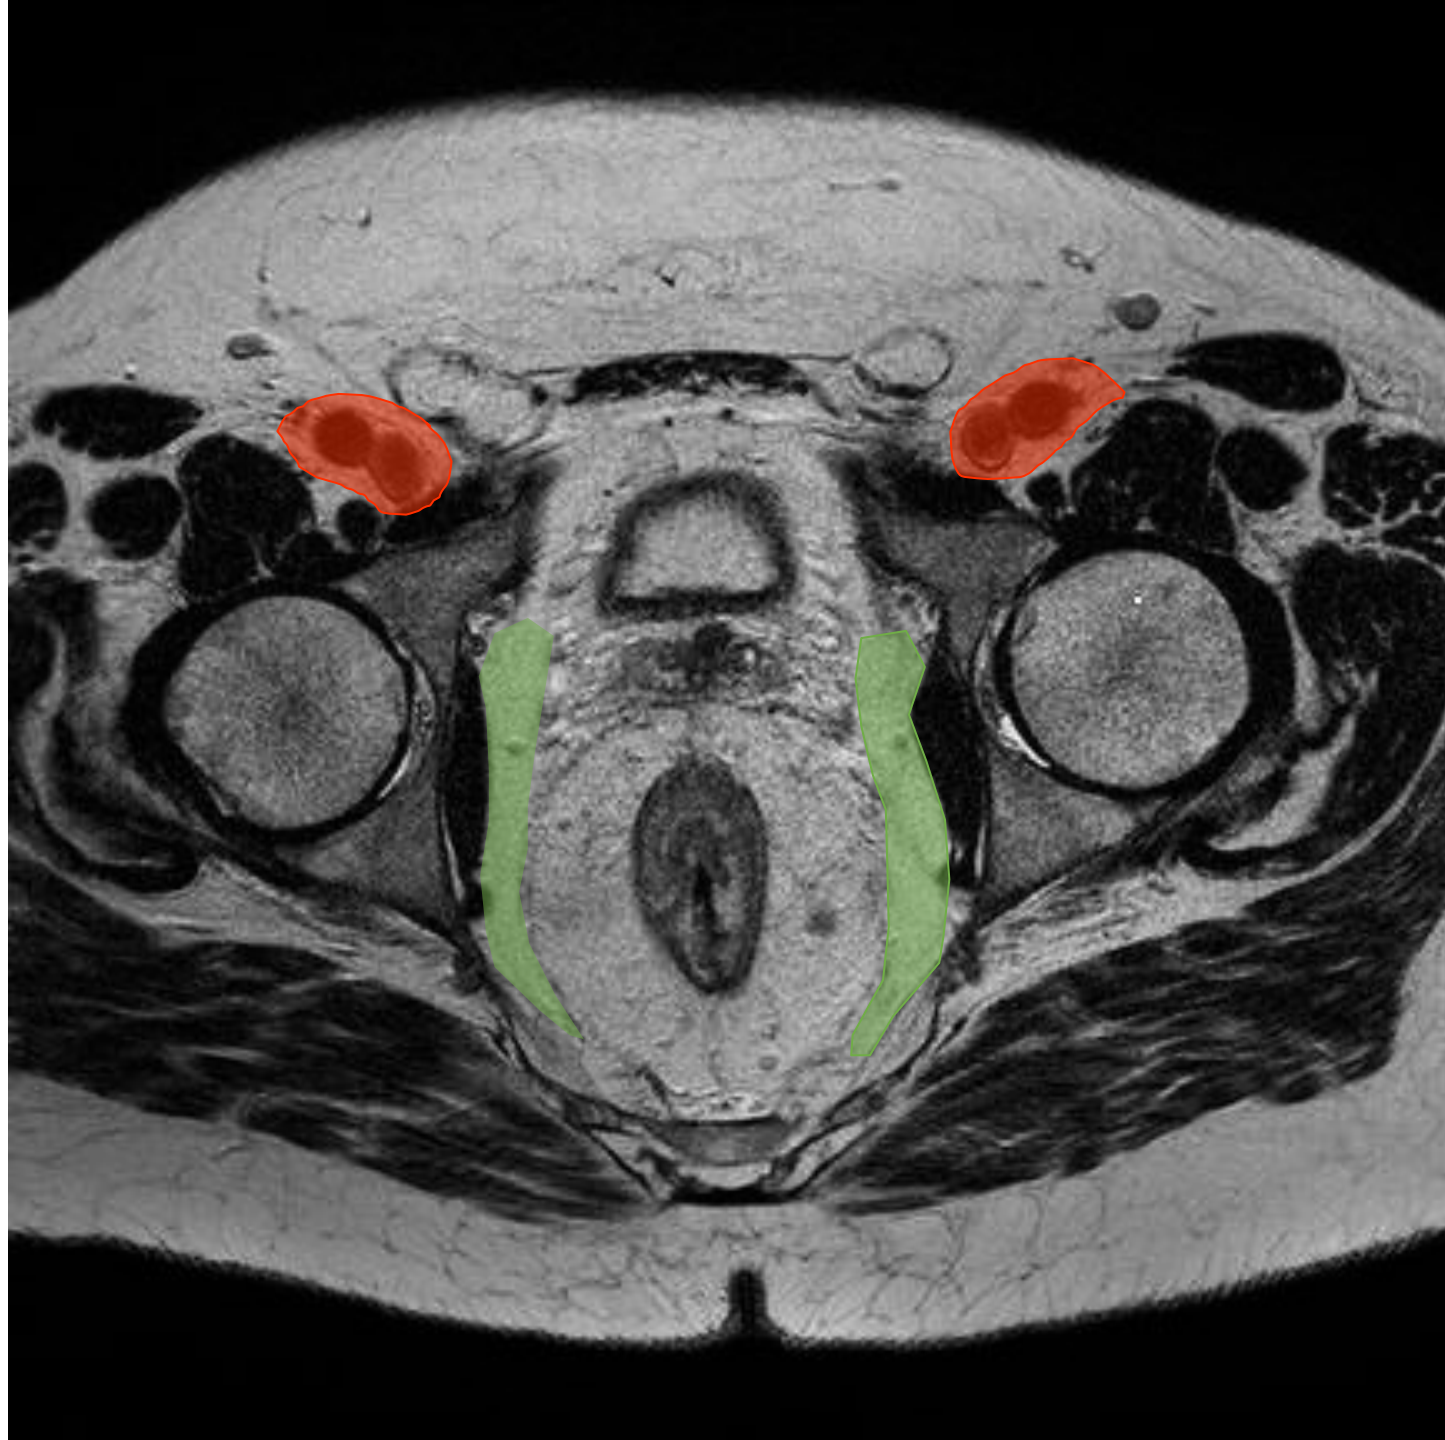

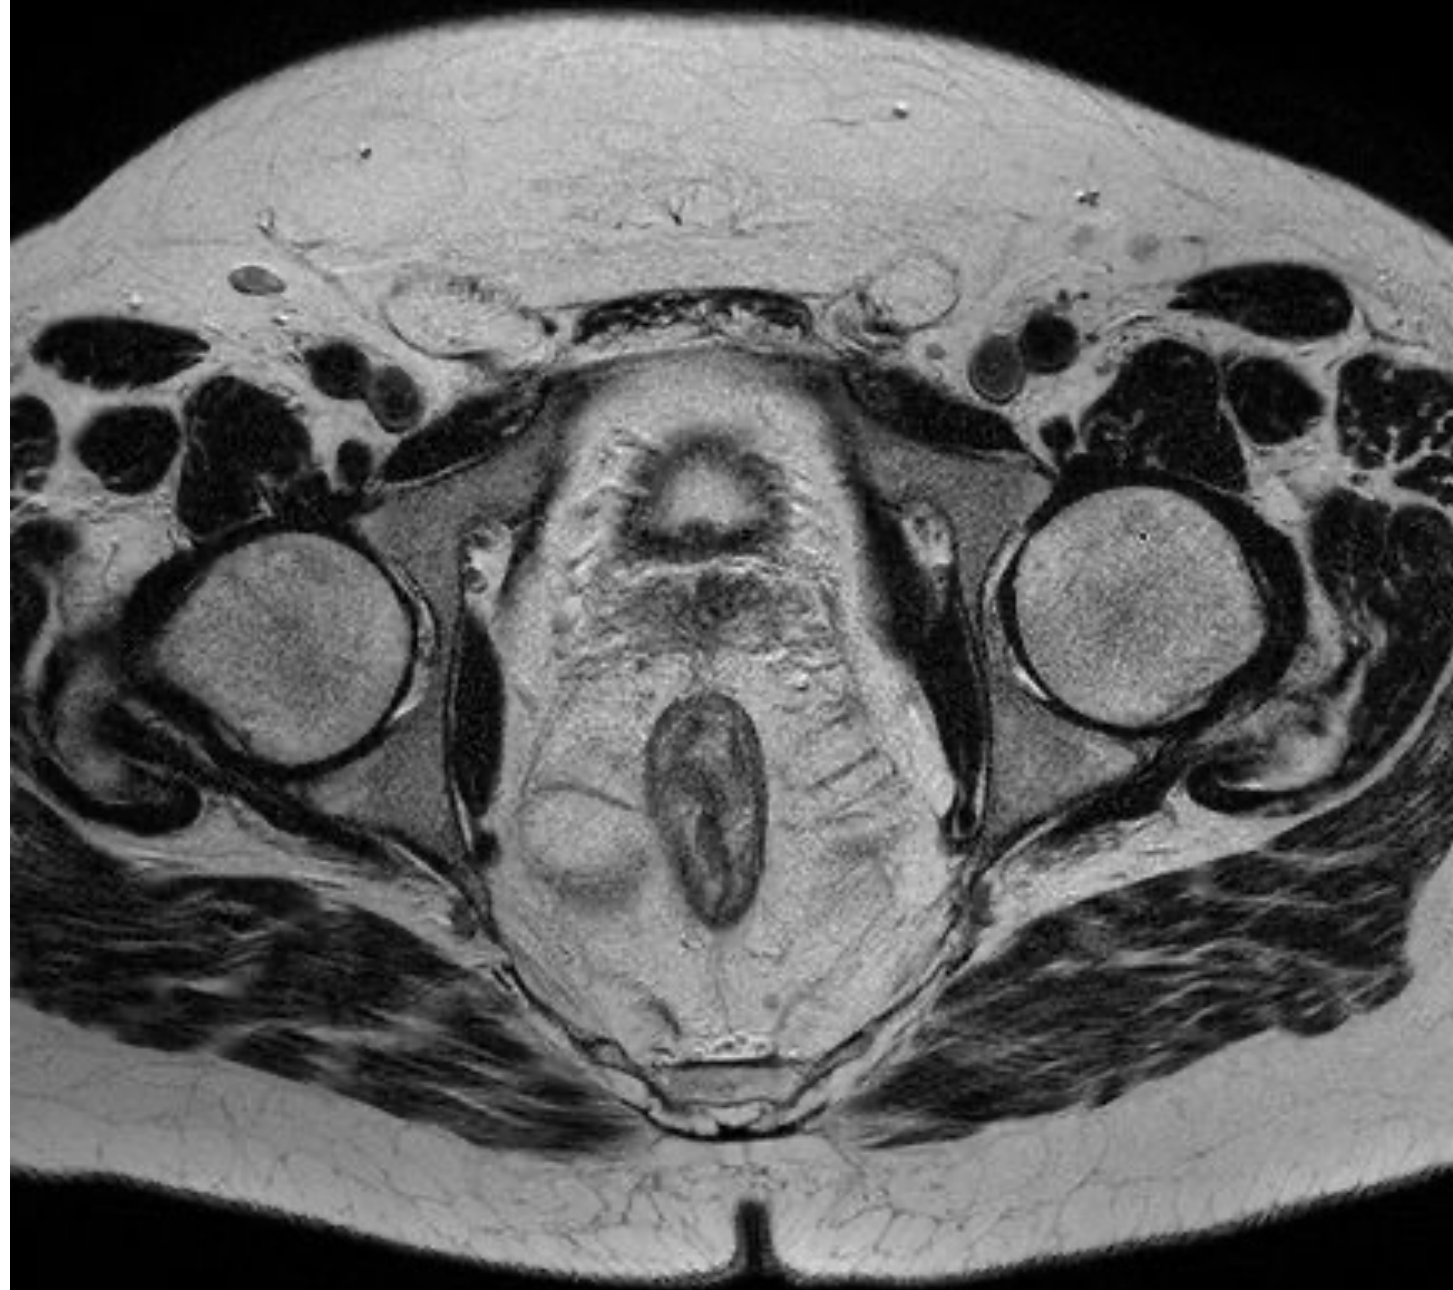

Supplement: dcr-67-42-s003.pdf [file dcr-67-42-s003.pdf]
