# Supplementary material for: Prognostic Implications of Lateral Lymph Nodes in Rectal Cancer: A Population-Based Cross-sectional Study With Standardized Radiological Evaluation After Dedicated Training
Source: PubMed Central journal article supplement (PMC10715698; doi:10.1097/dcr.0000000000002752), 2023-06-01
Supplement: dcr-67-42-s005.pdf [file dcr-67-42-s005.pdf]

Appendix 4: Explorative univariable analysis to determine the most appropriate cut-off value for SA diameter of internal iliac and obturator LLNs in patients (n=284) who received neoadjuvant treatment.

| <i>N=284</i> | <b>N (%)</b> | <b>4-yr LR</b> | <b>p-value</b> | <b>N (%)</b> | <b>4-yr LLR</b> | <b>p-value</b> |
|--------------|--------------|----------------|----------------|--------------|-----------------|----------------|
| SA ≥1mm      | 284 (100)    | 16.4%          | -              | 284 (100)    | 8.8%            | -              |
| SA <1mm      | 0            |                |                | 0            |                 |                |
| SA ≥2mm      | 284 (100)    | 16.4%          | -              | 284 (100)    | 8.8%            | .              |
| SA <2mm      | 0            |                |                | 0            |                 |                |
| SA ≥3mm      | 273 (96)     | 16.2%          | .567           | 273 (96)     | 8.6%            | .722           |
| SA <3mm      | 11 (4)       | 22.2%          |                | 11 (4)       | 11.1%           |                |
| SA ≥4mm      | 253 (89)     | 15.7%          | .343           | 253 (89)     | 9.3%            | .791           |
| SA <4mm      | 31 (11)      | 21.9%          |                | 31 (11)      | 3.8%            |                |
| SA ≥5mm      | 213 (75)     | 18.0%          | .256           | 213 (75)     | 10.4%           | .199           |
| SA <5mm      | 71 (25)      | 10.9%          |                | 71 (25)      | 3.4%            |                |
| SA ≥6mm      | 168 (59)     | 20.3%          | .107           | 168 (59)     | 11.8%           | .147           |
| SA <6mm      | 116 (41)     | 10.5%          |                | 116 (41)     | 4.2%            |                |
| SA ≥7mm      | 122 (43)     | 20.8%          | .165           | 122 (43)     | 14.7%           | <b>.018</b>    |
| SA <7mm      | 162 (57)     | 13.1%          |                | 162 (57)     | 4.4%            |                |
| SA ≥8mm      | 69 (24)      | 26.8%          | <b>.020</b>    | 69 (24)      | 19.4%           | <b>.003</b>    |
| SA <8mm      | 215 (76)     | 13.1%          |                | 215 (76)     | 5.5%            |                |
| SA ≥9mm      | 48 (17)      | 33.8%          | <b>.001</b>    | 48 (17)      | 23.6%           | <b>.001</b>    |
| SA <9mm      | 236 (83)     | 12.9%          |                | 236 (83)     | 6.0%            |                |
