# Supplementary material for: Prognostic Implications of Lateral Lymph Nodes in Rectal Cancer: A Population-Based Cross-sectional Study With Standardized Radiological Evaluation After Dedicated Training
Source: PubMed Central journal article supplement (PMC10715698; doi:10.1097/dcr.0000000000002752), 2023-06-01
Supplement: dcr-67-42-s006.pdf [file dcr-67-42-s006.pdf]

Appendix 7. Baseline criteria of the 891 patients with cT3-4M0 rectal cancer located  $\leq 8$ cm from the anorectal junction based on MRI re-review who received neoadjuvant radiotherapy divided into four groups: no LLNs, small ( $< 7$ mm) LLNs, enlarged ( $\geq 7$ mm) internal iliac LLNs and obturator LLNs.

| <i>Primarily enlarged (<math>\geq 7</math>mm) internal iliac or obturator LLNs versus smaller (<math>&lt; 7</math>mm) LLNs or no LLNs</i> | <b>Internal iliac LLNs, N=32 (%)</b> | <b>Obturator LLNs N=90 (%)</b> | <b><math>&lt; 7</math> mm LLNs N=162 (%)</b> | <b>No LLNs N=607 (%)</b> | <b>p value</b>   |
|-------------------------------------------------------------------------------------------------------------------------------------------|--------------------------------------|--------------------------------|----------------------------------------------|--------------------------|------------------|
| <b>Gender: male</b>                                                                                                                       | 22 (68.8)                            | 59 (65.6)                      | 107 (66.0)                                   | 393 (64.7)               | 0.966            |
| <b>Age</b>                                                                                                                                |                                      |                                |                                              |                          | <b>0.020</b>     |
| <55 years                                                                                                                                 | 4 (12.5)                             | 10 (11.1)                      | 7 (4.3)                                      | 29 (4.8)                 |                  |
| 55-74 years                                                                                                                               | 22 (68.8)                            | 46 (51.1)                      | 87 (53.7)                                    | 317 (52.2)               |                  |
| >75 years                                                                                                                                 | 6 (18.8)                             | 34 (37.8)                      | 68 (42.0)                                    | 261 (43.0)               |                  |
| <b>Distance of tumor from ARJ</b>                                                                                                         |                                      |                                |                                              |                          | <b>&lt;0.001</b> |
| 0.0-4.0cm                                                                                                                                 | 22 (68.8)                            | 72 (80.0)                      | 97 (59.9)                                    | 338 (55.7)               |                  |
| 4.1-8.0cm                                                                                                                                 | 10 (31.3)                            | 18 (20.0)                      | 65 (40.1)                                    | 269 (44.3)               |                  |
| <b>Tumor according to LOREC criteria</b>                                                                                                  |                                      |                                |                                              |                          | 0.055            |
| On/below                                                                                                                                  | 21 (65.6)                            | 66 (73.3)                      | 99 (61.1)                                    | 355 (58.5)               |                  |
| Above                                                                                                                                     | 11 (34.4)                            | 24 (26.7)                      | 63 (38.9)                                    | 252 (41.5)               |                  |
| <b>Clinical T-stage</b>                                                                                                                   |                                      |                                |                                              |                          | <b>&lt;0.001</b> |
| T3a ( $< 1$ mm beyond muscularis propria)                                                                                                 | 6 (18.8)                             | 5 (5.6)                        | 24 (14.8)                                    | 139 (22.9)               |                  |
| T3b (1-4.9mm beyond muscularis propria)                                                                                                   | 10 (31.3)                            | 26 (28.9)                      | 58 (35.8)                                    | 193 (31.8)               |                  |
| T3c (5-15mm beyond muscularis propria)                                                                                                    | 3 (9.4)                              | 29 (32.2)                      | 42 (25.9)                                    | 147 (24.2)               |                  |
| T3d ( $> 15$ mm beyond muscularis propria)                                                                                                | 2 (6.3)                              | 4 (4.4)                        | 11 (6.8)                                     | 29 (6.4)                 |                  |
| T4a (invasion of peritoneum)                                                                                                              | 3 (9.4)                              | 2 (2.2)                        | 12 (7.4)                                     | 36 (5.9)                 |                  |
| T4b (invasion surrounding organs/structures)                                                                                              | 8 (25.0)                             | 24 (26.7)                      | 15 (9.3)                                     | 53 (8.7)                 |                  |
| <b>Positive mesorectal fascia (MRF) or T4 on primary MRI (tumor <math>\leq 1</math>mm of the MRF)</b>                                     | 19 (59.4)                            | 57 (63.3)                      | 82 (50.6)                                    | 281 (46.3)               | <b>0.014</b>     |
| <b>Mesorectal clinical N-stage</b>                                                                                                        |                                      |                                |                                              |                          | <b>&lt;0.001</b> |
| N0                                                                                                                                        | 4 (12.5)                             | 9 (10.0)                       | 30 (18.5)                                    | 140 (23.1)               |                  |
| N1                                                                                                                                        | 12 (37.5)                            | 31 (34.4)                      | 75 (46.3)                                    | 282 (46.5)               |                  |
| N2                                                                                                                                        | 16 (50.0)                            | 50 (55.6)                      | 57 (35.2)                                    | 185 (30.5)               |                  |
| <b>mrEMVI on primary MRI</b>                                                                                                              | 11 (34.4)                            | 37 (41.1)                      | 56 (34.6)                                    | 210 (34.6)               | 0.668            |
| <b>Tumor deposits on primary MRI</b>                                                                                                      | 5 (15.6)                             | 15 (16.7)                      | 33 (20.4)                                    | 90 (14.8)                | 0.483            |
| <b>Neoadjuvant treatment</b>                                                                                                              |                                      |                                |                                              |                          | <b>0.026</b>     |
| Short-course radiotherapy                                                                                                                 | 7 (21.9)                             | 26 (28.9)                      | 57 (35.2)                                    | 248 (40.9)               |                  |
| Chemoradiotherapy                                                                                                                         | 25 (78.1)                            | 64 (71.1)                      | 105 (64.8)                                   | 359 (59.1)               |                  |
| <b>Resection of primary tumor</b>                                                                                                         |                                      |                                |                                              |                          | <b>&lt;0.001</b> |
| Non-sphincter sparing (APR/proctocolectomy)                                                                                               | 15 (46.9)                            | 54 (60.0)                      | 62 (38.3)                                    | 209 (34.4)               |                  |
| Sphincter sparing (LAR/TME/local excision)                                                                                                | 17 (53.1)                            | 36 (40.0)                      | 100 (61.7)                                   | 398 (65.6)               |                  |
| <b>Resection margins (%)</b>                                                                                                              |                                      |                                |                                              |                          | <b>0.002</b>     |
| R0                                                                                                                                        | 30 (93.8)                            | 74 (82.2)                      | 151 (93.2)                                   | 568 (93.6)               |                  |
| R1                                                                                                                                        | 2 (6.2)                              | 16 (17.8)                      | 11 (6.8)                                     | 39 (6.4)                 |                  |
