# Supplementary material for: Prognostic Implications of Lateral Lymph Nodes in Rectal Cancer: A Population-Based Cross-sectional Study With Standardized Radiological Evaluation After Dedicated Training
Source: PubMed Central journal article supplement (PMC10715698; doi:10.1097/dcr.0000000000002752), 2023-06-01
Supplement: dcr-67-42-s007.pdf [file dcr-67-42-s007.pdf]

Appendix 6. Multivariable analysis of **overall survival** in 891 patients with cT3-4 rectal cancer  $\leq 8$ cm from the anorectal junction, who were treated with neoadjuvant radiotherapy (short course or chemoradiotherapy). Lateral lymph nodes were included in the analysis based on visibility on primary staging MRI, and stratified for short-axis diameter with a cut-off value of 7mm.

| Variable                                    | No. | Univariable analysis |             |                  | Multivariable analysis |             |                  |
|---------------------------------------------|-----|----------------------|-------------|------------------|------------------------|-------------|------------------|
|                                             |     | HR                   | 95% CI      | P                | HR                     | 95% CI      | P                |
| <b>Enlarged (<math>\geq 7</math>mm) LLN</b> |     |                      |             | <b>0.074</b>     |                        |             | 0.623            |
| No LLN                                      | 607 | 1                    |             |                  | 1                      |             |                  |
| $\geq 7$ mm                                 | 122 | 1.506                | 1.053-2.153 |                  | 1.183                  | 0.806-1.734 |                  |
| $< 7$ mm                                    | 162 | 1.021                | 0.709-1.470 |                  | 0.955                  | 0.660-1.381 |                  |
| <b>Gender</b>                               |     |                      |             | 0.696            |                        |             |                  |
| Male                                        | 581 | 1                    |             |                  |                        |             |                  |
| Female                                      | 310 | 1.058                | 0.797-1.404 |                  |                        |             |                  |
| <b>Age in years</b>                         |     |                      |             | <b>&lt;0.001</b> |                        |             | <b>&lt;0.001</b> |
| $< 55$                                      | 50  | 1                    |             |                  | 1                      |             |                  |
| 55-75                                       | 472 | 0.853                | 0.427-1.702 |                  | 0.964                  | 0.480-1.936 |                  |
| 75+                                         | 369 | 2.109                | 1.072-4.151 |                  | 2.474                  | 1.241-4.934 |                  |
| <b>Neoadjuvant radiotherapy</b>             |     |                      |             | 0.296            |                        |             |                  |
| 5x5                                         | 338 | 1                    |             |                  |                        |             |                  |
| CRT                                         | 553 | 0.863                | 0.654-1.138 |                  |                        |             |                  |
| <b>Clinical T stage</b>                     |     |                      |             | <b>&lt;0.001</b> |                        |             | <b>0.002</b>     |
| T3a                                         | 174 | 1                    |             |                  | 1                      |             |                  |
| T3b                                         | 287 | 1.264                | 0.782-2.043 |                  | 1.340                  | 0.823-2.180 |                  |
| T3c                                         | 221 | 1.861                | 1.158-2.990 |                  | 1.709                  | 1.044-2.798 |                  |
| T3d                                         | 56  | 3.201                | 1.804-5.680 |                  | 2.501                  | 1.357-4.608 |                  |
| T4a                                         | 53  | 2.920                | 1.608-5.304 |                  | 2.327                  | 1.239-4.369 |                  |
| T4b                                         | 100 | 3.443                | 2.076-5.710 |                  | 2.829                  | 1.617-4.949 |                  |
| <b>Mesorectal clinical N stage</b>          |     |                      |             | 0.254            |                        |             |                  |
| N0                                          | 183 | 1                    |             |                  |                        |             |                  |
| N1                                          | 400 | 0.743                | 0.523-1.057 |                  |                        |             |                  |
| N2                                          | 308 | 0.841                | 0.586-1.207 |                  |                        |             |                  |
| <b>Extramural venous invasion (mrEMVI)</b>  |     |                      |             | <b>0.033</b>     |                        |             | 0.552            |
| Absent                                      | 577 | 1                    |             |                  | 1                      |             |                  |
| Present                                     | 314 | 1.351                | 1.025-1.782 |                  | 1.098                  | 0.806-1.496 |                  |
| <b>Tumor deposits</b>                       |     |                      |             | <b>0.001</b>     |                        |             | 0.062            |
| Absent                                      | 748 | 1                    |             |                  | 1                      |             |                  |
| Present                                     | 143 | 1.735                | 1.257-2.396 |                  | 1.394                  | 0.983-1.977 |                  |
| <b>Surgery*</b>                             |     |                      |             | <b>0.001</b>     |                        |             | 0.060            |
| Sphincter non-sparing                       | 340 | 1                    |             |                  | 1                      |             |                  |
| Sphincter sparing                           | 551 | 0.641                | 0.488-0.841 |                  | 0.754                  | 0.562-1.012 |                  |
| <b>Margin status</b>                        |     |                      |             | <b>&lt;0.001</b> |                        |             | <b>&lt;0.001</b> |
| R0                                          | 823 | 1                    |             |                  | 1                      |             |                  |
| R1                                          | 68  | 3.614                | 2.519-5.185 |                  | 2.285                  | 1.556-3.356 |                  |
