# Supplementary material for: Prognostic Implications of Lateral Lymph Nodes in Rectal Cancer: A Population-Based Cross-sectional Study With Standardized Radiological Evaluation After Dedicated Training
Source: PubMed Central journal article supplement (PMC10715698; doi:10.1097/dcr.0000000000002752), 2023-06-01
Supplement: dcr-67-42-s008.pdf [file dcr-67-42-s008.pdf]

Appendix 5. Multivariable analysis of **distant metastases** in 891 patients with cT3-4 rectal cancer  $\leq 8$  cm from the anorectal junction, who were treated with neoadjuvant radiotherapy (short course or chemoradiotherapy). Lateral lymph nodes were included in the analysis based on visibility on primary staging MRI, and stratified for short-axis diameter with a cut-off value of 7mm.

| Variable                                    | Univariable analysis |       |             |                                | Multivariable analysis |             |                                |
|---------------------------------------------|----------------------|-------|-------------|--------------------------------|------------------------|-------------|--------------------------------|
|                                             | No.                  | HR    | 95% CI      | P                              | HR                     | 95% CI      | P                              |
| <b>Enlarged (<math>\geq 7</math>mm) LLN</b> |                      |       |             | <b>0.021</b>                   |                        |             | 0.389                          |
| No LLN                                      | 607                  | 1     |             |                                | 1                      |             |                                |
| $\geq 7$ mm                                 | 122                  | 1.590 | 1.131-2.235 |                                | 1.268                  | 0.880-1.829 |                                |
| $< 7$ mm                                    | 162                  | 1.261 | 0.907-1.752 |                                | 1.145                  | 0.821-1.596 |                                |
| <b>Gender</b>                               |                      |       |             | 0.281                          |                        |             |                                |
| Male                                        | 581                  | 1     |             |                                |                        |             |                                |
| Female                                      | 310                  | 1.156 | 0.888-1.506 |                                |                        |             |                                |
| <b>Age in years</b>                         |                      |       |             | <b>0.033</b>                   |                        |             | <b>0.015</b>                   |
| $< 55$                                      | 50                   | 1     |             |                                | 1                      |             |                                |
| 55-75                                       | 472                  | 0.805 | 0.462-1.403 |                                | 1.003                  | 0.570-1.766 |                                |
| 75+                                         | 369                  | 1.146 | 0.656-2.001 |                                | 1.483                  | 0.835-2.632 |                                |
| <b>Neoadjuvant radiotherapy</b>             |                      |       |             | 0.731                          |                        |             |                                |
| 5x5                                         | 338                  | 1     |             |                                |                        |             |                                |
| CRT                                         | 553                  | 1.048 | 0.803-1.367 |                                |                        |             |                                |
| <b>Clinical T stage</b>                     |                      |       |             | <b><math>&lt; 0.001</math></b> |                        |             | <b>0.015</b>                   |
| T3a                                         | 174                  | 1     |             |                                | 1                      |             |                                |
| T3b                                         | 287                  | 1.027 | 0.666-1.584 |                                | 0.949                  | 0.611-1.472 |                                |
| T3c                                         | 221                  | 1.785 | 1.175-2.712 |                                | 1.456                  | 0.940-2.254 |                                |
| T3d                                         | 56                   | 1.991 | 1.121-3.537 |                                | 1.139                  | 0.620-2.094 |                                |
| T4a                                         | 53                   | 3.145 | 1.858-5.323 |                                | 2.151                  | 1.231-3.758 |                                |
| T4b                                         | 100                  | 2.790 | 1.754-4.438 |                                | 1.567                  | 0.934-2.632 |                                |
| <b>Mesorectal clinical N stage</b>          |                      |       |             | 0.120                          |                        |             |                                |
| N0                                          | 183                  | 1     |             |                                |                        |             |                                |
| N1                                          | 400                  | 1.010 | 0.705-1.447 |                                |                        |             |                                |
| N2                                          | 308                  | 1.325 | 0.924-1.901 |                                |                        |             |                                |
| <b>Extramural venous invasion (mrEMVI)</b>  |                      |       |             | <b>0.001</b>                   |                        |             | 0.166                          |
| Absent                                      | 577                  | 1     |             |                                | 1                      |             |                                |
| Present                                     | 314                  | 1.548 | 1.195-2.004 |                                | 1.227                  | 0.918-1.641 |                                |
| <b>Tumor deposits</b>                       |                      |       |             | <b><math>&lt; 0.001</math></b> |                        |             | <b><math>&lt; 0.001</math></b> |
| Absent                                      | 748                  | 1     |             |                                | 1                      |             |                                |
| Present                                     | 143                  | 2.323 | 1.737-3.107 |                                | 1.935                  | 1.406-2.663 |                                |
| <b>Surgery*</b>                             |                      |       |             | <b><math>&lt; 0.001</math></b> |                        |             | <b><math>&lt; 0.001</math></b> |
| Sphincter non-sparing                       | 340                  | 1     |             |                                | 1                      |             |                                |
| Sphincter sparing                           | 551                  | 0.545 | 0.422-0.705 |                                | 0.578                  | 0.439-0.762 |                                |
| <b>Margin status</b>                        |                      |       |             | <b><math>&lt; 0.001</math></b> |                        |             | <b><math>&lt; 0.001</math></b> |
| R0                                          | 823                  | 1     |             |                                | 1                      |             |                                |
| R1                                          | 68                   | 3.235 | 2.264-4.622 |                                | 2.265                  | 1.549-3.311 |                                |
